# Supplementary material for: Musculus senhousei peptides alleviated alcoholic liver injury via the gut–liver axis
Source: Royal Society of Chemistry journal article supplement (doi:10.1039/d4fo01070a), 2024-01-01
Supplement: d4fo01070a1.xlsx [file d4fo01070a1.xlsx]

## Sheet: Table S1
Table S1. Sequences of primer used for qRT-PCR.
Primer name	Forward primer sequence (5'-3')	Reversed primer sequence (5'-3')	Amplification efficiency
GAPDH	CCTCGTCCCGTAGACAAAATG	TGAGGTCAATGAAGGGGTCGT	1.027
CYP2E1	CGTTGCCTTGCTTGTCTGGA	AAGAAAGGAATTGGGAAAGGTCC	0.984
iNOS	AGCTCGGGTTGAAGTGGTATG	CACAGCCACATTGATCTCCG	0.976
TNF-α	CGGGCAGGTCTACTTTGGAG	CAGGTCACTGTCCCAGCATC	1.091
IL-1β	GAAATGCCACCTTTTGACAGTG	TGGATGCTCTCATCAGGACAG	1.053
MCP-1	CAGGTCCCTGTCATGCTTCT	GTGGGGCGTTAACTGCATCT	0.965
TNFR1	GGAGAACCAGTTCCAACGCTAC	GGAGGTAGGCACAACTTCATACACT	1.058
TLR4	AAATGCACTGAGCTTTAGTGGT	TGGCACTCATAATGATGGCAC	1.077
Bax	TGAAGACAGGGGCCTTTTTG	AATTCGCCGGAGACACTCG	0.949
Casp.3	TGGAATGTCATCTCGCTCTGGT	GAAGAGTTTCGGCTTTCCAGTC	1.011
Claudin-1	GGGGACAACATCGTGACCG	AGGAGTCGAAGACTTTGCACT	1.013
Claudin-3	ACCAACTGCGTACAAGACGAG	CAGAGCCGCCAACAGGAAA	0.994
ZO-1	GGGAAAACCCGAAACTGATG	GCTGTACTGTGAGGGCAACG	0.972
Occludin	TCTGCTTCATCGCTTCCTTAGT	AGCCGTACATAGATCCAGAAGC	0.974

## Sheet: Table S2
Table S2 Metabolites for the PCA and OPLS-DA analysis.
Compounds	Metabolites	Control-1	Control-2	Control-3	Control-4	Control-5	Control-6	Model-1	Model-2	Model-3	Model-4	Silymarin-1	Silymarin-2	Silymarin-3	Silymarin-4	Silymarin-5	Silymarin-6	MSP-1	MSP-2	MSP-3	MSP-4	MSP-5
comp.1	Dihydrojasmonic acid	1.03707e+08	7.68709e+07	1.98039e+08	184968233	1.17131e+08	2.06512e+08	1.47915e+08	2.35581e+08	2.51336e+08	2.36161e+08	2.25009e+08	3.70193e+08	4.39297e+08	303308216	2.68213e+08	2.61287e+08	1.08742e+08	2.97844e+06	4.95127e+08	4.18396e+06	8.30462e+07
comp.2	3-Methylcyclopentadecanone	2.02409e+08	1.57082e+08	1.08931e+08	2.09076e+08	2.62348e+08	1.94589e+08	1.08951e+08	1.59877e+08	149435898	2.96207e+08	1.46913e+08	110375250	2.35634e+08	251249228	2.29977e+08	2.71874e+08	2.21118e+08	1.70617e+08	1.83555e+08	3.07373e+08	2.82042e+08
comp.3	9,10-DHOME	8.78508e+07	5.44248e+07	1.32958e+08	9.00695e+07	8.74958e+07	9.07906e+07	3.71116e+07	7.67545e+07	1.28104e+08	1.14744e+08	1.63584e+08	1.22073e+08	1.55932e+08	1.28772e+08	4.39089e+08	1.06021e+08	1.21375e+08	1.03578e+08	1.63978e+08	8.58439e+07	1.04018e+08
comp.4	PC(18:0/18:1(9Z))	1.93112e+07	7.78448e+06	8.46108e+06	6.59994e+06	1.29803e+07	1.19468e+07	1.08138e+07	5.9603e+06	4.24844e+06	5.59704e+06	1.61194e+07	2.20079e+07	1.56276e+07	3.24883e+07	1.61354e+07	3.72207e+07	1.62334e+07	1.65661e+07	1.24327e+07	1.77259e+07	4.48013e+07
comp.5	Leu-Phe	1.42825e+07	1.19208e+07	2.8607e+07	2.91687e+07	1.58438e+07	2.2482e+07	6.59734e+06	2.32455e+06	2.00001e+07	4.3055e+07	8.45109e+06	1.13871e+07	8.58114e+06	2.41552e+07	4.84005e+06	3.54368e+07	1.32829e+07	2.60379e+07	4.05444e+06	1.49955e+07	6.15589e+06
comp.6	Bufalin	1.50088e+07	2.32978e+06	1.32828e+07	2.81749e+07	2.33866e+07	1.03732e+07	1.49518e+07	8.5706e+06	8.70811e+06	9.38652e+06	1.13909e+07	6.36537e+06	1.3423e+07	5.88232e+06	1.05954e+07	5.70535e+07	1.27136e+06	5.80172e+06	1.13705e+07	6.03933e+06	1.40623e+07
comp.7	Enterolactone	3.49562e+07	1.82768e+07	4.24558e+07	4.14807e+07	3.96073e+07	3.94984e+07	2.08598e+07	4.55883e+07	6.71696e+07	6.11495e+07	2.95226e+07	4.50082e+07	4.29858e+07	45127430	3.43964e+07	4.72306e+07	2.04791e+07	686493	4.20223e+07	621121	6.66571e+06
comp.8	Linoleoyl ethanolamide	1.11996e+08	1.0039e+08	1.77623e+08	1.49431e+08	1.3084e+08	1.13378e+08	8.3138e+07	129189976	132716360	8.93562e+07	1.20326e+08	2.18653e+08	1.76776e+08	1.90208e+08	2.28069e+08	2.15867e+08	1.78669e+08	1.70466e+08	1.45495e+08	1.60344e+08	1.50186e+08
comp.9	7α-Hydroxy-3-oxo-4-cholestenoate	4.30362e+07	1.47917e+07	1.59379e+07	1.44124e+07	1.4912e+07	1.05627e+07	4.17315e+07	1.79735e+07	3.90062e+07	4.77404e+07	6.70809e+07	3.291e+07	2.41331e+07	2.56286e+07	9.55117e+06	1.01273e+07	2.62215e+07	3.50129e+07	1.06444e+07	5.63065e+07	3.30596e+07
comp.10	Equol	3.82202e+08	1.94775e+08	354579166	3.65503e+08	3.0623e+08	2.46027e+08	7.7307e+07	7.17386e+07	3.02559e+08	2.57604e+08	1.93573e+08	3.67866e+08	2.46052e+08	2.17979e+08	5.65718e+08	4.94109e+08	2.96197e+08	4.25277e+06	4.25543e+08	1.64948e+07	4.64073e+07
comp.11	PC(18:2(9Z,12Z)/18:2(9Z,12Z))	1.10198e+07	4.06085e+06	2.90403e+07	8.29392e+06	6.33974e+06	1.12806e+07	2.12934e+06	4.79436e+06	1.11526e+07	4.96146e+06	8.95816e+06	1.97395e+07	1.10746e+07	4.18096e+07	6.42575e+07	2.39473e+07	1.19753e+07	9.58708e+06	1.45268e+07	3.18978e+07	1.13227e+07
comp.12	Eicosadienoic acid	2.24488e+08	2.71859e+07	9.12476e+07	6.80282e+07	2.90534e+08	8.886e+07	5.78168e+08	3.22294e+07	7.69923e+08	7.92919e+08	1081846959	1.42791e+08	2.15361e+08	9.74804e+07	5.1212e+08	3.93433e+08	3.23618e+08	987764	1.32746e+07	1.86766e+06	1227530525
comp.13	Eicosenoic acid	3.90496e+08	1.61128e+08	4.56639e+08	2.81427e+08	325986688	2.21035e+08	2.83983e+08	2.57374e+08	6.19319e+08	4.26923e+08	5.3755e+08	3.62942e+08	6.70888e+08	2.61605e+08	4.22767e+08	4.41221e+08	3.58903e+08	178833637	4.38621e+08	3.66604e+08	7.78182e+08
comp.14	11-Dehydro-thromboxane B2	1.77347e+07	1.46986e+07	1.76864e+07	1.68974e+07	2.34564e+07	2.5594e+07	9.30561e+06	1.51722e+07	3.3302e+07	2.088e+07	1.33863e+07	1.81889e+07	2.46802e+07	1.86799e+07	8.90748e+06	1.25715e+07	1.18498e+07	1.23287e+07	3.09657e+07	1.20997e+07	4.505e+06
comp.15	12-OPDA	5.27892e+07	1.76622e+07	6.51626e+07	4.77481e+07	3.27889e+07	4.33557e+07	2.2905e+07	3.14271e+07	3.99729e+07	3.59249e+07	4.64337e+07	6.28173e+07	5.85596e+07	6.65999e+07	6.99517e+07	3.56239e+07	5.98585e+07	5.99793e+07	1.25167e+08	1.25798e+08	6.36388e+07
comp.16	13-HOTE	2.09942e+07	5.20109e+06	2.78247e+07	8.85863e+06	9.94001e+06	1.98575e+07	6.73334e+07	1.41314e+07	4.03036e+07	6.9927e+07	6.17189e+07	2.66458e+07	5.27593e+07	1.85735e+07	2.34264e+07	4.78339e+07	2.30657e+07	1.49832e+07	3.85038e+07	1.50835e+07	2.04491e+07
comp.17	16-Hydroxy hexadecanoic acid	2.92197e+07	4.64771e+07	2.94536e+07	3.85283e+07	6.96062e+07	3.28456e+07	8.87883e+07	3.60114e+07	8.28148e+07	1.12497e+08	441415850	8.02367e+07	1.75809e+08	9.2209e+07	7.68626e+07	6.84911e+07	5.17799e+07	3.58048e+07	1.33697e+08	5.1902e+07	4.98434e+08
comp.18	DG(16:0/18:2(9Z,12Z)/0:0)	8.07715e+07	3.5845e+08	8.90917e+08	1.50534e+08	5.21318e+07	200467061	1.52174e+08	7.5837e+07	1.62004e+08	5.7129e+08	5.50748e+08	1334090873	3.01945e+08	5.86918e+08	3.57715e+08	1154826863	1441597951	410829024	1.13026e+08	5.46043e+08	3.1777e+08
comp.19	MG(18:2(9Z,12Z)/0:0/0:0)	7274863926	6972069102	11089675708	10454887533	6009628602	8747998245	3878368549	6714033094	7136831186	3154972845	8256606100	9281487810	8182878181	8402651886	6940868102	17461727226	6535474410	5139921663	8171102090	5846530237	3442376967
comp.20	1-Naphthol	6.13479e+06	5.21193e+06	5.35227e+06	5.06115e+06	1.08637e+07	4.15887e+06	4.9927e+06	5.68142e+06	7.47721e+06	8.07789e+06	6.59026e+06	5.21462e+06	1.01606e+07	9.38793e+06	9.59983e+06	1.17119e+07	8.38775e+06	4.24804e+06	8.98897e+06	9.1758e+06	1.6469e+07
comp.21	LysoPE(18:1(11Z)/0:0)	8.08643e+07	6.65601e+07	1.25919e+08	9.69204e+07	9.24836e+07	8.12721e+07	2.52143e+08	1.19513e+08	3.45944e+08	5.55713e+08	4.29552e+08	1.60656e+08	3.78549e+08	3.23831e+08	1.22079e+08	3.09443e+08	590725855	6.68784e+08	3.02839e+08	6.14034e+08	9.7442e+08
comp.22	LysoPC(O-18:0)	3.12349e+07	3.2404e+07	6.52544e+07	4.8145e+07	4.04759e+07	3.8176e+07	5.11569e+07	3.28079e+07	5.51344e+07	4.97779e+07	1.71239e+08	2.04667e+08	1.7486e+08	9.27707e+07	131185246	2.43579e+08	1.7138e+08	8.25052e+07	8.98585e+07	1.98456e+08	2.89018e+08
comp.23	MG(18:0/0:0/0:0)	6336730351	5821852860	4697422379	7453150957	8659477542	7460261908	4739698613	6784179979	6826654220	9902567593	6886633861	5198115776	8777385278	9364717448	7368608916	8599224722	7341277788	5356868296	8193614225	8727513119	10475044645
comp.24	N-Acetyltryptophan	2.30501e+06	6.93317e+06	1.46393e+06	1.4974e+06	2.09767e+06	770506	81234.6	1.20835e+06	78933.5	158626	495571	1.87319e+06	310021	1.3821e+06	687926	2.19674e+06	2.78997e+07	4.78437e+07	6.54355e+06	4.51614e+07	587993
comp.25	N-Acetyl-L-methionine	2.08361e+07	8.49232e+06	2.49932e+07	1.77022e+07	1.60643e+07	1.35798e+07	1.77645e+07	1.1712e+07	3.14904e+07	3.4369e+07	8.07248e+07	2.31493e+07	4.26771e+07	2.11835e+07	1.30696e+07	2.66725e+07	1.54591e+07	1.0795e+07	2.73184e+07	6.42196e+07	5.63431e+07
comp.26	Avocadene 1-acetate	1.15241e+06	776424	591206	574109	2.90438e+06	531673	4.29432e+06	823645	1.33439e+06	4.29448e+06	1.31919e+06	535216	1.79612e+06	715824	1.09763e+07	1.24897e+06	1.43229e+06	268717	3.92493e+06	542905	1.35704e+06
comp.27	Diloxanide	6.42497e+07	2.34604e+07	4.54114e+07	2.57743e+07	5.1919e+07	3.18325e+07	5.53368e+07	8.13996e+07	4.6357e+07	7.44449e+07	9.73008e+07	1.2825e+08	7.15997e+07	4.70165e+07	3.50317e+07	5.7645e+07	7.68165e+07	5.79063e+07	1.66415e+08	1.02068e+08	7.65838e+07
comp.28	2-Hydroxymyristic acid	2.93492e+06	2.66951e+06	3.00771e+06	2.87556e+06	3.7849e+06	2.68519e+06	7.8644e+06	2.76352e+06	1.10943e+07	1.26856e+07	2.06885e+07	3.03629e+06	5.29216e+06	2.79053e+06	4.26146e+06	6.30233e+06	1.16601e+07	2.60039e+06	1.00782e+07	2.87e+06	4.17394e+07
comp.29	L-Tyrosine	3.33893e+06	3.07353e+08	2.41832e+06	8.31557e+06	1.8538e+07	6.85032e+06	1.60127e+07	3.41461e+06	3.04272e+07	4.38925e+07	3.26445e+07	1.075e+07	1.80683e+07	1.3773e+07	2.81968e+07	4.87837e+07	3.59838e+07	2.01083e+06	1.90748e+07	1.1775e+07	1.37921e+08
comp.30	2(3H)-Benzothiazolethione	1.68225e+08	1.94452e+08	1.27373e+08	152349944	1.65444e+08	164804469	1.88606e+08	1.4308e+08	1.32725e+08	2.15559e+08	1.24806e+08	7.51001e+07	1.03009e+08	1.55984e+08	1.57136e+08	1.17944e+08	1.04157e+08	1.17825e+08	100184970	184173387	1.85302e+08
comp.31	2-Naphthalenesulfonic acid	2.17656e+07	1.09439e+07	1.7061e+07	6.55294e+06	5.7373e+06	8.90796e+06	3.44936e+06	6.16356e+06	9.49908e+06	8.62097e+06	1.06448e+07	6.73834e+06	1.43679e+07	6.05657e+06	4.24798e+06	1.07987e+07	6.55761e+06	4.57252e+06	6.30677e+06	1.29234e+07	7.90247e+06
comp.32	3-Hydroxypicolinic acid	6.94351e+07	3.9093e+07	5.66465e+07	4.24383e+07	5.49809e+07	6.51072e+07	4.92446e+07	1.00425e+08	9.58341e+07	1.4083e+08	8.48884e+07	6.45709e+07	6.15901e+07	4.4185e+07	2.76156e+07	7.64677e+07	4.4645e+07	8.28365e+07	5.70925e+07	7.91605e+07	2.65452e+07
comp.33	4-Hydroxybenzaldehyde	5.56844e+07	3.15396e+07	5.25348e+07	5.30046e+07	5.05816e+07	3.89334e+07	1.20515e+07	1.23002e+07	4.61964e+07	4.17678e+07	2.85936e+07	5.71968e+07	3.53289e+07	3.23644e+07	7.1449e+07	6.91971e+07	4.06879e+07	1.66265e+06	5.70328e+07	1.76164e+06	6.01778e+06
comp.34	4'-Methoxyacetophenone	3.37915e+07	2.84526e+07	6.97102e+07	7.64602e+07	4.76858e+07	7.09445e+07	2.84743e+07	2.66302e+07	7.01171e+07	6.90703e+07	9.58645e+07	7.00861e+07	8.43296e+07	7.24699e+07	9.81414e+07	1.28195e+08	1.99257e+07	6.10011e+06	9.66917e+07	1.32991e+07	1.21783e+08
comp.35	4-Methoxybenzaldehyde	3.52268e+06	3.18507e+06	5.5285e+06	4.17735e+06	3.07187e+06	4.09065e+06	1.05777e+07	2.22581e+06	2.28703e+07	2.32669e+07	4.14741e+07	1.66842e+07	2.01481e+07	8.79212e+06	1.32374e+07	1.29169e+07	3.38978e+07	4.03598e+06	4.61417e+07	5.14892e+06	124233286
comp.36	5-(2-Hydroxyethyl)-4-methylthiazole	1.55888e+07	7775427	1.09238e+07	5.58881e+06	1.30846e+07	8.43481e+06	1.96511e+07	2.92121e+07	2.30819e+07	2.65432e+07	6.09798e+07	2.59981e+07	6.08371e+07	4.55029e+07	4.40303e+07	5.59666e+07	1.30188e+07	2.10495e+06	6.25669e+07	2.08988e+06	8.60875e+07
comp.37	Benzenebutanoic acid	1.87852e+08	5.10567e+07	1.1683e+08	1.89717e+08	1.55696e+08	8.4599e+07	7.0216e+07	3.22344e+07	1.19379e+08	1.23877e+08	2.18425e+08	1.20361e+08	1.22405e+08	9.0222e+07	1.5688e+08	3.52034e+08	5.96292e+07	2.75458e+07	2.17969e+08	5.83245e+07	4.49236e+08
comp.38	Vicenin 2	127198	201436	119004	105233	93179.8	86063.8	47064.8	82157.4	54299.1	61109.1	66997.9	87449.3	52055.7	55746.8	43098.9	60881.4	6.8522e+06	1.28153e+07	1.35485e+06	8.9594e+06	481056
comp.39	5-Hydroxyindoleacetic acid	1.37736e+07	7.69717e+06	1.58372e+07	1.46646e+07	1.29067e+07	1.28058e+07	4.10959e+06	1.08386e+07	1.90535e+07	1.7999e+07	1.14915e+07	1.53675e+07	1.39998e+07	1.268e+07	1.6536e+07	1.61683e+07	5.75672e+06	1.64665e+06	1.70606e+07	2.81433e+06	3.41562e+06
comp.40	Dihydrotestosterone	1.96967e+07	1.44002e+07	3.18117e+07	2.74701e+07	1.44178e+07	2.09444e+07	1.18022e+07	1.47177e+07	2.33772e+07	1.78297e+07	1.82135e+07	3.56518e+07	2.99145e+07	3.91846e+07	3.17833e+07	3.5295e+07	2.29002e+07	2.22024e+07	1.97079e+07	2.46191e+07	1.96962e+07
comp.41	5a-Pregnane-3,20-dione	7.44275e+06	1.90491e+06	6.13274e+06	4.05194e+06	6.83929e+06	1.04131e+06	5.79979e+06	752792	589740	751394	1.14836e+07	3.66499e+06	5.36167e+06	971571	7.07807e+06	1.40671e+07	2.5691e+07	8.69528e+06	2.32156e+06	2.2567e+07	1.33052e+07
comp.42	N-(6-Aminohexanoyl)-6-aminohexanoate	7.98552e+06	1.13201e+07	2.1305e+07	2.14905e+07	1.56352e+07	1.41558e+07	6.00207e+06	2.70829e+06	1.72757e+07	4.1511e+07	5.03108e+06	5.25689e+06	4.33348e+06	1.25436e+07	3.14897e+06	1.81018e+07	5.78364e+06	1.0169e+07	1.76611e+06	5.26448e+06	3.58833e+06
comp.43	6''-O-Acetylgenistin	1.61322e+06	1.31257e+06	8.25979e+06	996602	1.6828e+06	1.10331e+06	1.0423e+06	1.14822e+06	1.09341e+06	1.66498e+06	1.30106e+06	2.41972e+06	1.71073e+06	2.38942e+06	1.32605e+07	1.9215e+06	2.38095e+06	4.50199e+06	1.22966e+06	2.36812e+06	2.06036e+06
comp.44	3-Oxocholic acid	5.00592e+08	5.55589e+08	1208942527	1704036518	6.35014e+08	9.95462e+08	9.31103e+08	1173994121	7.96104e+08	9.37559e+08	2.90126e+08	3.18617e+08	1.46148e+08	3.80133e+08	2.55346e+08	9.0993e+08	4.52631e+08	8.91506e+07	6.9099e+08	1.11138e+08	4.63164e+08
comp.45	7-Methylguanine	2.6526e+07	1.85644e+07	8.93066e+07	7.40061e+07	2.66387e+07	6.88958e+07	3.89017e+07	2.26969e+07	1.70775e+07	4.50781e+07	8.22408e+07	6.20852e+07	3.29461e+07	1.92718e+07	1.74558e+07	4.61789e+07	126616439	1.02266e+08	2.438e+07	8.47715e+07	4.51355e+07
comp.46	8,11,14-Eicosatrienoic acid	5.60494e+07	4.93417e+07	9.45154e+07	107977440	3.19972e+07	6.53542e+07	7.33895e+07	6.13892e+07	1.22439e+08	1.23183e+08	4.62131e+08	4.30018e+08	2.06881e+08	1.49722e+08	1.23657e+08	111434358	8.55092e+07	5.56571e+07	2.08903e+08	5.87404e+07	542496577
comp.47	9-HODE	3.05863e+08	1.7849e+08	4.16607e+08	3.44241e+08	2.50663e+08	3.32458e+08	2.28706e+08	3.39286e+08	3.31467e+08	387607787	2.92962e+08	854770646	737523884	7.8541e+08	8.52258e+08	5.78093e+08	5.26619e+08	5.21229e+08	1380459226	1113309418	5.7546e+08
comp.48	9-OxoODE	7.11861e+08	3.61359e+08	9.21751e+08	7.12468e+08	2.98039e+08	6.64853e+08	4.30063e+08	5.1112e+08	6.38521e+08	5.61084e+08	5.28529e+08	6.38659e+08	8.59094e+08	8.81298e+08	850459726	972277412	713919905	7.00698e+08	1589907215	1292470499	5.29174e+08
comp.49	Abietic acid	3.72e+07	3.41496e+07	6.67641e+07	6.68865e+07	3.81439e+07	5.96774e+07	4.46563e+07	2.99082e+07	2.91252e+07	3.91605e+07	4.64301e+07	7.70604e+07	4.71166e+07	4.2335e+07	49970528	3.21551e+07	7.66546e+07	5.17242e+07	5.61506e+07	7.0592e+07	1.25793e+08
comp.50	Acetophenone	1.4172e+07	1.59369e+07	2.3569e+06	4.28118e+06	5.40985e+06	2.02645e+07	4.82036e+07	1.72859e+07	1.55036e+07	1.48906e+07	2.10505e+07	3.31778e+06	1.68658e+07	1.92978e+07	1.95787e+07	1.95425e+07	1.86094e+08	3.43167e+08	161315201	1.17097e+08	9.66074e+06
comp.51	Methacholine	509752109	9.33543e+08	8.56196e+08	8.43098e+08	4.70538e+08	755035274	2.30311e+08	1.91049e+08	1061986936	1200783996	1163243419	6.7037e+08	1128247779	8.90008e+08	2.85753e+08	5.84182e+08	5.05492e+07	3.14087e+07	4.58597e+08	4.39721e+07	8.31968e+08
comp.52	Adrenic acid	7.04428e+07	1.32568e+07	5.05743e+07	3.31118e+07	7.81563e+07	4.15065e+07	1.04358e+08	3.43965e+07	1.74581e+08	1.41688e+08	2.36041e+08	3.91333e+07	6.16982e+07	3.94513e+07	8.11216e+07	9.60256e+07	8.31023e+07	6.19348e+06	2.88457e+07	2.62542e+07	3.20969e+08
comp.53	Apigenin	1.00814e+07	3.94659e+06	5.86555e+06	5.47967e+06	845070	3.48721e+06	545371	1.25068e+06	1.27086e+06	415990	2.07798e+06	2.41364e+06	2.14111e+06	4.01449e+06	2.81746e+06	1.12603e+06	2.65063e+07	2.36437e+07	6.23063e+06	3.48811e+07	768012
comp.54	Arachidic acid	1.43051e+08	1.3039e+08	1.94562e+08	1.32599e+08	2.57553e+08	1.12715e+08	1.47954e+08	1.69077e+08	3.03127e+08	1.76601e+08	2.49635e+08	1.31564e+08	3.20571e+08	1.52546e+08	2.3488e+08	2.45398e+08	1.32566e+08	1.33968e+08	2.20816e+08	2.01835e+08	1.70884e+08
comp.55	Arg-Phe	3.30235e+06	1.46373e+06	9.21339e+06	5.67343e+06	1.28799e+06	6.78627e+06	3.02386e+06	1.66693e+06	5.21773e+06	1.54729e+07	1.7687e+06	2.174e+06	2.07513e+06	4.34224e+06	851212	3.6698e+06	948916	2.18358e+06	724609	1.41871e+06	466462
comp.56	Esculentic acid	5.18595e+07	5.21611e+07	6.83709e+07	9.48847e+07	8.91977e+07	5.03905e+07	4.33043e+06	8.80037e+06	1.97682e+06	2.42657e+06	6.81788e+07	6.01794e+07	6.31169e+06	4.36051e+06	4.10044e+07	5.90769e+07	2.16517e+07	3.57142e+06	3.88806e+06	5.86416e+06	1.68637e+06
comp.57	Aspartame	1.83357e+07	2.49354e+07	2.88387e+07	2.21418e+07	1.23737e+07	2.62813e+07	1.439e+07	1.20238e+07	2.87442e+07	5.40781e+07	1.36495e+07	8.60336e+06	1.01336e+07	1.73365e+07	1.8155e+06	1.83666e+07	1.06301e+07	1.78455e+07	5.20079e+06	1.27675e+07	3.91096e+06
comp.58	Avocadyne 1-acetate	4.95404e+06	1.40038e+06	3.92672e+06	2.43476e+06	7.0488e+06	3.389e+06	5.0914e+06	6.58443e+06	4.39996e+06	6.43247e+06	7.37383e+06	3.58196e+06	1.01623e+07	5.8374e+06	1.62137e+07	4.97121e+06	2.69186e+06	1.41643e+06	1.40172e+07	1.82438e+06	6.13561e+06
comp.59	1,11-Undecanedicarboxylic acid	1.18876e+08	1.19403e+07	6.90085e+07	3.00761e+07	1.43127e+07	5.0119e+07	1.06986e+07	2.98438e+07	5.2143e+07	3.5269e+07	3.89413e+07	3.05139e+07	4.58257e+07	1.58294e+07	13475349	1.77607e+07	2.02165e+07	1.57835e+07	2.1416e+07	6.28697e+07	1.90941e+07
comp.60	epsilon-Caprolactam	1.39607e+07	2.83587e+06	1.52602e+07	1.61615e+07	3.29673e+07	1.55274e+07	1.83356e+07	2.80662e+07	2.32419e+07	2.94093e+07	3.08313e+07	2.98563e+07	5.47014e+07	2.55164e+07	2.32289e+07	43577845	40977301	1.8182e+07	3.8201e+07	2.71111e+07	7.70133e+07
comp.61	Ceramide (d18:1/9Z-18:1)	4.7697e+07	8.69921e+06	1.42508e+07	1.26491e+07	1.8369e+07	1.16724e+07	9.30818e+06	6.33442e+07	1.02333e+07	5.7707e+07	1.19728e+08	5.84812e+08	2.44506e+07	2.16817e+07	1.07174e+07	7.34124e+07	1.05326e+08	6.71801e+07	1.17472e+07	4.13262e+07	3.44299e+07
comp.62	Cholecalciferol	2.18914e+06	1.57519e+06	1.00491e+07	1.1484e+07	3.0967e+06	9.52186e+06	3.85783e+06	3.57474e+06	8.36222e+06	6.13788e+06	1.65281e+07	7.5776e+06	1.85532e+07	1.45968e+07	9.99363e+06	1.53958e+07	4.32258e+07	4.01743e+06	1.10977e+07	4.1488e+06	1.99385e+08
comp.63	Cholesta-4,6-dien-3-one	1.28428e+07	5.09698e+06	1.56524e+07	1.71096e+07	1.83647e+07	1.55381e+07	1.13593e+07	1.00655e+07	1.92191e+07	1.60409e+07	4.19869e+07	3.34992e+07	2.43229e+07	2.75694e+07	6.21798e+07	1.03558e+08	1.60676e+07	1.16786e+07	3.17617e+07	2.31018e+07	3.38123e+07
comp.64	Cholestenone	5.45878e+07	2.25612e+07	1.0195e+08	7.58154e+07	7.52238e+07	90420289	1.33336e+08	4.5952e+07	1.23967e+08	8.75904e+07	3.12692e+08	1.48211e+08	1.34325e+08	1.15623e+08	1.40947e+08	1.78605e+08	3.596e+08	4.42224e+07	4.5196e+08	7.56357e+07	8.46031e+08
comp.65	Corchorifatty acid F	9.58709e+06	1.04408e+07	3.00109e+07	1.96341e+07	1.86995e+07	7.13499e+06	8.71286e+06	5.76329e+06	5.69385e+06	23525552	7.09538e+06	1.92002e+07	3.18531e+07	2.01626e+07	4.62251e+07	1.78612e+07	1.82807e+07	1.89947e+07	3.56254e+07	5.63106e+07	5.35665e+07
comp.66	Cortisol	9.07966e+06	620634	3.60753e+06	1.37906e+06	910153	905968	1.07222e+06	1.06677e+06	291289	958973	1.42027e+06	717089	1.93098e+06	1.05581e+06	1.77123e+06	2.68569e+06	1.14926e+07	2.20622e+07	2.28357e+06	4.4452e+07	1.26293e+06
comp.67	Corymboside	2.82171e+06	4.78014e+06	1.61832e+06	5.79436e+06	404559	1.00178e+06	434053	470250	776486	676431	1.4303e+06	1.38866e+06	1.6049e+06	2.00358e+06	4.17704e+06	931437	2.18257e+08	3.69238e+08	4.76762e+07	3.45522e+08	1.97178e+07
comp.68	L,L-Cyclo(leucylprolyl)	1.62871e+07	5.49879e+06	1.51937e+07	1.9377e+07	2.54331e+07	1.92813e+07	1.98683e+07	2.67883e+07	2.13427e+07	3.70281e+07	4.1515e+07	1.83484e+07	3.94108e+07	2.32651e+07	2.94779e+07	5.83026e+07	1.99089e+07	1.49511e+07	4.00348e+07	4.17622e+07	7.27868e+07
comp.69	Pipecolic acid	2.48555e+08	3.06123e+08	154079024	1.44981e+08	1.60631e+08	1.0999e+08	2.87751e+08	3.24785e+08	2.32007e+08	4.71267e+08	4.52625e+08	5.79399e+07	1.42856e+08	6.61602e+07	6.05543e+07	250281456	1.3444e+08	2.19732e+08	1.23673e+08	9.75629e+07	7.16479e+07
comp.70	Daidzein	9.43543e+07	6.11965e+07	2.31788e+08	2.5406e+08	1.98481e+07	1.20273e+08	6.26156e+06	2.66948e+07	1.3953e+08	1.31893e+08	3.90195e+07	4.88771e+07	4.01431e+07	6.49926e+07	1.22384e+08	8.63308e+07	2.77606e+08	6.05859e+08	9.99728e+07	8.0337e+08	1.62371e+07
comp.71	Dehydroandrosterone	3.57989e+06	1.15119e+06	4.44877e+06	4.25252e+06	4.21154e+06	5.95391e+06	7.35143e+06	5.07523e+06	2.41022e+07	2.26369e+07	4.03308e+07	1.46955e+07	6.35388e+07	1.45144e+07	2.52661e+07	4.33737e+07	1.00279e+07	3.18223e+06	5.71984e+06	4.34808e+06	3.621e+07
comp.72	Deoxycholic acid	666696631	498497899	5.82541e+08	1158470749	3336976294	1281597781	4847181776	1733170317	1981633466	2364419134	3830164376	8.8495e+08	2589320932	9.9908e+08	3582079730	2924604496	2202507601	8.50093e+06	1629104637	1.03061e+07	7139952590
comp.73	Diosmetin	338925	584567	999888	737726	538391	1.14953e+06	299021	382041	356683	359338	3.08021e+06	857752	347532	238506	402328	347668	9.40195e+06	7.75945e+06	795599	1.11856e+07	592166
comp.74	L-Arginine	3.50052e+08	5.28463e+08	230782170	2.43195e+08	1.84191e+08	2.15273e+08	1.69775e+08	2.39035e+08	2.77543e+08	4.79281e+08	2.37964e+08	6.68882e+07	6.22867e+07	1.05496e+08	5.4351e+07	3.51686e+08	1.52453e+08	3.12496e+08	3.38331e+07	5.47788e+07	2.15383e+07
comp.75	L-Lysine	2.47771e+08	3.11322e+08	1.58265e+08	1.52292e+08	1.6364e+08	1.14929e+08	2.89543e+08	3.23942e+08	2.45138e+08	4.89053e+08	4.59704e+08	5.92518e+07	1.46456e+08	6.79574e+07	6.19713e+07	261706533	1.40431e+08	230462791	1.27984e+08	104500089	7.50908e+07
comp.76	DL-2-Aminooctanoic acid	2.78397e+07	2.13134e+07	3.93341e+07	3.06815e+07	2.45012e+07	3.18384e+07	3.26779e+07	2.91948e+07	3.38396e+07	3.77849e+07	2.10611e+07	3.90242e+07	5.64167e+07	3.201e+07	1.93546e+07	1.86014e+07	1.12372e+07	2.5129e+06	5.01286e+07	3.66175e+06	7.68311e+06
comp.77	Docosapentaenoic acid	8.67215e+07	4.00191e+07	7.4077e+07	6.70253e+07	7.58099e+07	6.72894e+07	1.49747e+08	6.47524e+07	1.30762e+08	1.3934e+08	3.84223e+08	1.27772e+08	135249525	6.1002e+07	1.51752e+08	1.40232e+08	1.34091e+08	2.07118e+07	1.18576e+08	3.33956e+07	4.37929e+08
comp.78	Docosatrienoic acid	2.38589e+07	1.23009e+07	2.14116e+07	2.09545e+07	4.88419e+07	1.57022e+07	5.70061e+07	2.24532e+07	2.56157e+08	2.93654e+08	1.70375e+08	9.48277e+07	1.96832e+08	8.71455e+07	1.00348e+08	137923347	7.10582e+07	6.51336e+06	1.12754e+08	1.01786e+07	3.36095e+08
comp.79	Sphingosine	6.89363e+08	3.82281e+08	4.73138e+08	409178880	5.66419e+08	3.46555e+08	1373902565	3.8865e+08	2032567736	1906970102	4955109028	1031936864	9.4222e+08	5.26318e+08	1867203712	2032132438	1216259831	2.75059e+08	1363196847	4.69138e+08	5994137978
comp.80	Val-Met	9.42537e+06	6.04335e+06	1.28924e+07	1.77271e+07	1.26479e+07	1.32372e+07	3.68511e+06	2.19955e+06	7.75944e+06	1.7611e+07	5.78096e+06	5.03458e+06	5.52061e+06	8.41276e+06	3.38308e+06	1.58994e+07	2.97341e+06	4.28445e+06	479233	3.53512e+06	3.59452e+06
comp.81	Erucic acid	9.82346e+07	5.26304e+07	1.25854e+08	7.28193e+07	1.46633e+08	5.02429e+07	1.3025e+08	108398711	161741233	9.74639e+07	170272993	74422112	1.87329e+08	6.9201e+07	1.7825e+08	9.85294e+07	1.9778e+08	1.25384e+08	1.71492e+08	2.42074e+08	1.44827e+08
comp.82	trans-Ferulic acid	8.15616e+07	6.72938e+07	1.50181e+08	1.77886e+08	9.16424e+07	1.16764e+08	2.59005e+07	1.10915e+08	7.34755e+07	6.88174e+07	3.29536e+07	3.5657e+07	2.80147e+07	5.84967e+07	1.75664e+07	9.16449e+07	6.79242e+07	8.93187e+07	3.58165e+07	6.44932e+07	3.88909e+06
comp.83	Gabapentin	2.64042e+08	1.4577e+07	2.20551e+08	9.38922e+07	1.74235e+07	9.56681e+07	1.48363e+07	5.60327e+07	111684841	7.28578e+07	1.62533e+08	1.70871e+08	2.0294e+08	4.33254e+07	2.34248e+07	7.35861e+07	4.31138e+07	4.08955e+07	3.13734e+07	1.46311e+08	5.14768e+07
comp.84	γ-CEHC	4.41621e+07	6.6926e+06	3.76231e+07	3.3164e+07	3.28309e+07	2.87776e+07	1.03606e+07	9.06638e+06	1.52108e+07	1.48154e+07	1.34294e+07	1.73181e+07	2.03364e+07	8.36967e+06	1.14395e+07	1.34097e+07	1.55475e+07	5.66029e+06	1.76303e+07	1.96706e+07	6.42059e+06
comp.85	γ-Glu-Leu	1.11428e+08	6.704e+07	6.21388e+07	4.83791e+07	3.43837e+07	4.17071e+07	7.60291e+07	5.13663e+07	7.63209e+07	8.57155e+07	9.46861e+07	2.65607e+07	3.61848e+07	2.51837e+07	6.1519e+06	3.7986e+07	3.11915e+07	4.78796e+07	1.30012e+07	5.35435e+07	14012525
comp.86	Genistein	711175	1.11264e+06	9.80498e+06	1.29863e+06	308580	1.37316e+06	103072	184164	200361	140021	1.86785e+06	1.77987e+06	506121	2.58294e+06	6.9078e+06	3.09162e+06	6.80092e+06	1.258e+07	2.01711e+06	1.05175e+07	1.30511e+06
comp.87	4-Guanidinobutanoic acid	1.52794e+08	3.97891e+07	1.30279e+08	7.0974e+07	3.02573e+07	7.65961e+07	1.64321e+07	4.04041e+07	5.63308e+07	3.28249e+07	4.93122e+07	5.05672e+07	3.54256e+07	2.28999e+07	5.42052e+07	5.39407e+07	4.41949e+07	4.84879e+07	2.48361e+07	8.36209e+07	3.14552e+07
comp.88	Gln-Leu	1.02573e+07	2.2759e+07	2.20266e+07	1.77066e+07	10293071	1.56954e+07	6.0115e+06	3.6149e+06	7.2767e+06	2.06275e+07	1.86296e+06	6.2842e+06	5.42154e+06	7.82341e+06	1.40946e+06	8.43758e+06	1.29423e+07	2.46908e+07	4.77654e+06	1.7402e+07	5.15197e+06
comp.89	Glu-Leu	8.75501e+07	1.23265e+08	1.39495e+08	1.21462e+08	6.79345e+07	1.13657e+08	1.68363e+07	2.43869e+07	5.65375e+07	1.26961e+08	2.52832e+07	6.24766e+06	1.10653e+07	2.1069e+07	2.30374e+06	3.98597e+07	3.093e+07	6.0612e+07	4.43504e+06	4.56754e+07	5.50601e+06
comp.90	Glu-Phe	2.75878e+07	3.91599e+07	3.77336e+07	3.70211e+07	1.9219e+07	2.9408e+07	8.95262e+06	8.59398e+06	2.92512e+07	3.15876e+07	1.36327e+07	5.31291e+06	8.85294e+06	8.51889e+06	5.32989e+06	1.91446e+07	1.3616e+07	2.04392e+07	5.40812e+06	1.57841e+07	4.58696e+06
comp.91	Glycitein	247939	212083	652195	189008	175649	166466	217794	213331	226596	248227	325224	243338	331623	263865	542192	263199	1.39551e+06	2.22482e+06	1.12497e+06	4.34903e+06	720523
comp.92	Gly-Phe	8.80538e+07	1.13605e+08	1.13613e+08	1.27363e+08	7.23952e+07	9.51179e+07	1.49567e+07	3.22496e+07	4.95791e+07	8.43651e+07	1.91944e+07	2.38744e+07	1.84883e+07	3.45043e+07	1.47491e+07	5.66047e+07	2.81725e+07	5.1376e+07	7.35562e+06	3.61251e+07	6.26739e+06
comp.93	Leu-Gly	1.3052e+08	1.90363e+08	1.40629e+08	167058895	9.42785e+07	1.06949e+08	2.23111e+07	5.02635e+07	7.18899e+07	1.10296e+08	2.24114e+07	2.3107e+07	2.06713e+07	3.32691e+07	1.85768e+07	4.55731e+07	5.45418e+07	1.0006e+08	1.33887e+07	5.49549e+07	6.1756e+06
comp.94	Gly-Leu	4.85759e+07	7.85995e+07	7.87765e+07	8.87203e+07	6.93707e+07	6.84662e+07	1.35112e+07	2.33193e+07	4.0278e+07	6.76771e+07	1.44547e+07	2.17795e+07	1.39307e+07	2.51359e+07	1.02582e+07	4.19804e+07	1.78103e+07	3.28248e+07	5.66991e+06	1.7387e+07	4.51947e+06
comp.95	Heneicosanoic acid	1.33123e+07	8.12584e+06	1.45157e+07	9.08297e+06	2.00483e+07	6.05148e+06	9.79341e+06	1.11643e+07	2.21745e+07	1.20556e+07	4.21516e+07	8.87335e+06	3.64971e+07	1.0244e+07	2.93808e+07	3.35061e+07	1.0732e+06	1.26256e+07	2.03135e+07	2.19152e+07	1.50118e+07
comp.96	Palmitic amide	1252508601	5.1377e+08	1082185812	1049624033	1925614075	1023874187	1097026340	1449144599	1288842637	1545320853	1797179741	1400352686	1755704767	1771046476	1471183966	2004610067	1086605772	9.21844e+08	1902579565	1244380012	2219828435
comp.97	Hexadecanedioic acid	1.06762e+07	4.81307e+06	8.15035e+06	7.95657e+06	1.35108e+07	8.3934e+06	2.54618e+07	1.09462e+07	2.86857e+07	4.23063e+07	8.22973e+07	9.31375e+06	3.86544e+07	1.4875e+07	1.65514e+07	2.17453e+07	1.34023e+07	5.76552e+06	2.23947e+07	8.64322e+06	5.18648e+07
comp.98	Gly-Met	1.10066e+07	1.73449e+07	1.35506e+07	1.62362e+07	7.12762e+06	1.2491e+07	2.51875e+06	3.79001e+06	7.19483e+06	1.41019e+07	3.2033e+06	1.24096e+06	1.08198e+06	4.175e+06	1.13183e+06	4.22895e+06	3.33e+06	6.40142e+06	443246	4.30768e+06	2.03856e+06
comp.99	His-Pro	1.2282e+07	1.31057e+07	7.03449e+06	8.15148e+06	8.08083e+06	3.57701e+06	2.94406e+06	4.95564e+06	1.04921e+07	9.65987e+06	1.91821e+06	1.90245e+06	1.46904e+06	2.8776e+06	1.78986e+06	1.17455e+07	2.00027e+06	5.02169e+06	1.18468e+06	1.2577e+06	708503
comp.100	Ile-Ile	4.29171e+07	3.67116e+07	1.0382e+08	1.08673e+08	5.07026e+07	6.60595e+07	2.84998e+07	1.32409e+07	8.38361e+07	1.8253e+08	2.59453e+07	2.51617e+07	2.48796e+07	6.19516e+07	1.59564e+07	9.25361e+07	3.08604e+07	4.71929e+07	1.02147e+07	3.07009e+07	1.83021e+07
comp.101	Iso-Leu	8.89886e+06	6.94071e+06	1.13076e+07	9.1086e+06	1.96092e+07	9.18373e+06	1.93884e+07	1.62658e+07	4.1317e+07	3.72111e+07	4.61022e+07	9.76796e+06	3.23353e+07	1.37218e+07	1.99963e+07	3.81167e+07	8.84861e+06	7.2754e+06	1.08107e+07	1.0371e+07	1.81002e+07
comp.102	Ile-Met	9.46257e+06	7.84877e+06	1.85325e+07	1.67376e+07	1.19469e+07	1.81666e+07	4.67486e+06	2.53759e+06	1.31997e+07	2.83128e+07	6.03358e+06	2.37295e+06	4.37865e+06	1.0059e+07	2.07001e+06	1.71876e+07	2.66354e+06	4.37697e+06	319914	3.10392e+06	2.02368e+06
comp.103	Ile-Trp	1.14702e+07	7.40775e+06	1.19327e+07	2.10397e+07	1.16586e+07	1.17862e+07	2.42486e+06	2.04684e+06	7.07264e+06	1.22596e+07	2.9842e+06	4.5471e+06	2.97195e+06	6.15674e+06	3.56987e+06	1.37757e+07	2.00245e+06	3.68122e+06	904599	2.26369e+06	693531
comp.104	Indole	7.36958e+07	4.13058e+07	9.40791e+07	7.50845e+07	8.73438e+07	78284813	6.46923e+07	6.48393e+07	7.47431e+07	7.53999e+07	9.8186e+07	6.93859e+07	8.43842e+07	8.21784e+07	9.89467e+07	2.82143e+08	100497987	2.66925e+07	4.30601e+07	3.83599e+07	7.70886e+07
comp.105	Indole-3-acetic acid	6.17846e+07	7.44341e+07	135217076	1.27033e+08	6.21999e+07	1.26755e+08	5.33059e+07	1.20628e+08	1.02572e+08	9.48532e+07	8.93188e+07	8.92863e+07	8.86612e+07	7.32398e+07	9.57789e+07	6.52632e+07	8.90426e+07	1.28654e+07	1.19919e+08	2.55948e+07	7.38194e+07
comp.106	Indole-3-lactic acid	2.17176e+07	1.35645e+07	1.61434e+07	7.46727e+06	9.71066e+06	7.41105e+06	1.81631e+06	5.19004e+06	1.64221e+06	2.56748e+06	2.74325e+06	1.00945e+07	2.51754e+06	1.98629e+06	2.27715e+06	3.09345e+06	9.42732e+07	1.53719e+08	1.83858e+07	1.82105e+08	6.50526e+06
comp.107	Isoeugenyl acetate	1.85041e+07	1.59957e+07	7.49875e+07	6.27841e+07	2.33703e+07	4.96081e+07	4.02669e+06	1.00068e+07	3.56466e+07	1.71402e+07	3.37787e+07	5.02989e+07	3.73988e+07	4.86471e+07	6.11373e+07	4.50698e+07	7.68311e+07	32131206	3.44367e+07	5.31798e+07	1.07316e+07
comp.108	3,5,5-Trimethyl-2-cyclohexen-1-one	2.96291e+08	9.07975e+07	4.76605e+08	4.32435e+08	6.95458e+08	4.04156e+08	5.84131e+08	8.04764e+08	6.60825e+08	8.59428e+08	9.45247e+08	5.89784e+08	1176113601	7.16303e+08	7.80803e+08	1333961296	7.86245e+08	597714322	1384395508	8.33311e+08	1393173130
comp.109	Kynurenic acid	4.52332e+08	1.87766e+08	4.42884e+08	3.10154e+08	1.73212e+08	3.01731e+08	1.44497e+08	2.81078e+08	3.47221e+08	3.48856e+08	2.86101e+08	2.23912e+08	1.20738e+08	9.903e+07	2.48158e+08	2.74709e+08	2.37522e+08	8.56039e+07	3.74479e+08	1.63053e+08	3.75726e+07
comp.110	Leu-Pro	2.579e+08	1.47851e+08	2.68448e+08	2.012e+08	1.81476e+08	1.17073e+08	4.11257e+07	7.82643e+07	5.72946e+08	6.16719e+08	1.01939e+08	6.91315e+07	7.89278e+07	9.28126e+07	1.24051e+08	4.03138e+08	9.5261e+07	1.55906e+08	2.24172e+07	9.94303e+07	1.36786e+07
comp.111	Leu-Trp	4.73778e+06	4.45937e+06	8.33319e+06	9.45592e+06	5.22109e+06	6.112e+06	3.17309e+06	1.09754e+06	8.67344e+06	1.53399e+07	6.19824e+06	4.82979e+06	3.8614e+06	7.82123e+06	3.44341e+06	1.30971e+07	9.93982e+06	1.78429e+07	3.75321e+06	9.35516e+06	4.86941e+06
comp.112	Leu-Val	8.19052e+06	1.96149e+07	1.58091e+07	1.8104e+07	1.60436e+07	1.4593e+07	3.24437e+06	2.24229e+06	1.09865e+07	2.68702e+07	3.2649e+06	3.53589e+06	3.6314e+06	7.94858e+06	2.25553e+06	1.07091e+07	7.7204e+06	1.52426e+07	1.97865e+06	7.38047e+06	1.25676e+06
comp.113	Tetracosanoic acid	6.29554e+07	6.35503e+07	8.50736e+07	6.05105e+07	7.96229e+07	4.44484e+07	3.60644e+07	5.38828e+07	111082049	5.43444e+07	1.10677e+08	6.12069e+07	9.575e+07	5.37086e+07	7.15433e+07	7.58251e+07	4.76257e+07	4.60889e+07	6.48974e+07	5.27214e+07	5.39306e+07
comp.114	Lithocholic acid	3.35837e+07	1.09583e+07	5.85361e+07	5.5317e+07	6.05533e+07	5.92936e+07	8.96097e+07	2.59989e+07	8.12897e+07	7.79978e+07	1.43787e+08	38860585	7.66824e+07	3.19148e+07	9.84731e+07	6.83686e+07	6.06782e+07	1.10987e+06	8.53896e+07	878244	9.44914e+07
comp.115	LysoPE(0:0/15:0)	149940343	9.99317e+07	350186435	3.52135e+08	5.149e+08	2.48104e+08	1903682044	4.28554e+08	1277552761	2435716473	1214956069	1272783287	1599561589	1044504396	2.75254e+08	1488756183	3764800065	2483818607	1105624323	1892123810	3919086169
comp.116	LysoPE(0:0/18:0)	5.44765e+08	4.24958e+08	4.67402e+08	5.56748e+08	6.26924e+08	3.13177e+08	5.01338e+08	4.31595e+08	5.56861e+08	7.41957e+08	1184413114	4.59584e+08	4.0656e+08	4.50758e+08	3.0341e+08	5.10493e+08	8.72251e+08	9.88358e+08	4.73365e+08	1495782753	1720017391
comp.117	LysoPE(0:0/20:3(11Z,14Z,17Z))	4.57737e+06	1.35167e+06	7.62339e+06	7.10955e+06	3.7877e+06	6.12477e+06	3.37946e+06	5.28039e+06	1.36748e+07	3.66198e+07	1.36778e+07	1.04123e+07	3.59949e+07	3.15204e+07	2.99581e+06	3.86343e+07	1.82687e+06	1.4712e+06	7.28213e+06	2.34794e+06	1.3816e+07
comp.118	Trp-Thr	6.44802e+06	7.51281e+06	1.21965e+07	1.16526e+07	8.10271e+06	1.11702e+07	3.31771e+06	3.26875e+06	6.96182e+06	1.17363e+07	3.18843e+06	7.12694e+06	3.67224e+06	8.5288e+06	2.89405e+06	1.12379e+07	7.50579e+06	1.45047e+07	2.66975e+06	5.36412e+06	1.99859e+06
comp.119	6''-O-Malonyldaidzin	200355	200146	5.05224e+06	170263	148768	155671	138670	130161	162885	183575	1.51438e+06	487138	253799	1.78119e+06	2.26729e+06	833390	4.87634e+06	1.09318e+07	310372	1.48437e+07	9.65283e+06
comp.120	Medicagenic acid	8.21209e+07	3.06512e+07	7.44886e+07	6.58826e+07	1.13982e+08	5.80759e+07	3.75016e+07	3.5753e+07	5.87017e+07	6.36641e+07	7.14217e+07	1.15778e+08	1.57332e+08	6.74923e+07	5.65239e+07	7.08465e+07	1.95491e+07	2.06327e+06	5.25892e+07	2.87778e+06	2.95953e+07
comp.121	Indole-3-methyl acetate	1.11421e+07	7.45728e+06	1.83976e+07	1.13983e+07	1.24334e+07	1.63291e+07	6.25191e+06	5.22559e+07	1.03683e+07	8.47305e+06	1.56183e+07	2.39327e+07	24972159	1.95272e+07	1.26723e+07	6.97708e+06	1.66612e+07	688417	1.99169e+07	677337	1.03423e+07
comp.122	Methyl hexadecanoic acid	1.106e+07	1.03029e+07	1.66883e+07	1.17947e+07	5.62601e+06	1.06398e+07	3.50595e+06	4.26225e+06	9.97741e+06	5.13032e+06	4.41062e+07	2.54766e+07	2.00513e+07	1.87624e+07	2.58498e+07	5.1956e+07	8.90414e+06	7.85618e+06	8.68967e+06	5.29129e+06	6.22091e+06
comp.123	Phe-Phe	1.03473e+07	6.76422e+06	1.54862e+07	1.84411e+07	7.01872e+06	7.73463e+06	2.73497e+06	1.90669e+06	5.55339e+06	1.00784e+07	4.34103e+06	7.69845e+06	4.72198e+06	8.17302e+06	3.11243e+06	1.21217e+07	4.64743e+06	8.19081e+06	1.86894e+06	6.13062e+06	4.83283e+06
comp.124	γ-Glu-Lys	2.51339e+06	8.93055e+06	3.88806e+06	1.79858e+06	1.20694e+06	2.45289e+06	7.06777e+06	1.17922e+06	2.28836e+06	9.12976e+06	3.42402e+06	2.34698e+06	1.05148e+06	1.15702e+06	1.11336e+06	1.58869e+06	1.84188e+07	3.74499e+07	5.36675e+06	7.97325e+06	1.87043e+06
comp.125	MG(0:0/18:3(9Z,12Z,15Z)/0:0)	8.81462e+08	8.36722e+08	1309038982	1223533718	4.84898e+08	1142799907	3.1639e+08	6.29191e+08	6.21631e+08	461266260	5.53643e+08	1180867653	8.06372e+08	9.88284e+08	664880756	5.98858e+08	511487038	4.87015e+08	4.56768e+08	4.79332e+08	2.15529e+08
comp.126	Moupinamide	1.91939e+06	1.20957e+06	2.97542e+06	1.86127e+06	157635	1.52264e+06	206151	298886	1.39604e+06	868879	854249	1.07409e+06	940112	284488	1.98328e+06	1.2602e+06	2.66236e+06	3.85249e+06	4.76639e+06	8.40158e+06	1.21252e+06
comp.127	Myristic acid	1.73651e+07	2.20897e+07	1.45356e+07	1.52709e+07	1.76844e+07	1.49298e+07	1.4959e+07	1.5328e+07	2.37718e+07	2.82495e+07	3.02041e+07	2.01646e+07	2.612e+07	1.83746e+07	1.6632e+07	2.53715e+07	1.32867e+07	7.93925e+06	2.59276e+07	1.34638e+07	2.75204e+07
comp.128	Sodium Tetradecyl Sulfate	8.0547e+06	1.72773e+07	5.88956e+06	1.29455e+07	1.01538e+07	7.05817e+06	5.5772e+06	4.32655e+06	6.74911e+06	5.3543e+06	7.25018e+06	3.78088e+06	8.34714e+06	8.41211e+06	4.46292e+06	7.20982e+06	8.73793e+06	6.94859e+06	9.32916e+06	1.21263e+07	2.18273e+07
comp.129	N,N-Dimethylsphingosine	2.2491e+07	2.86802e+07	2.73891e+07	2.76016e+07	2.87006e+07	2.42287e+07	3.93803e+08	1.03862e+08	1.50976e+08	1.21412e+08	2.98519e+08	1.89939e+08	1.8798e+08	1.47786e+08	4.08242e+08	3.04059e+08	2.40697e+08	4.01423e+07	4.01504e+08	8.62172e+07	5.42045e+08
comp.130	N6-Carbamoyl-L-threonyladenosine	9.78034e+06	457661	1.52188e+07	3.35605e+06	187273	2.64519e+06	630087	212013	6.11945e+06	7.1745e+06	8.48251e+06	1.70278e+06	2.0843e+06	2.2105e+06	1.97376e+06	3.99871e+06	4.98576e+06	8.54014e+06	1.03932e+06	1.00489e+07	2.14464e+06
comp.131	N-Acetyl-L-methionine	1.35533e+07	3.46418e+06	1.53283e+07	9.8383e+06	6.05516e+06	7.50127e+06	1.15933e+07	7.68568e+06	1.90422e+07	1.67536e+07	4.72265e+07	1.29733e+07	2.2521e+07	1.34744e+07	8.67881e+06	1.50952e+07	1.00549e+07	6.14781e+06	1.86772e+07	4.29328e+07	3.57269e+07
comp.132	N-Acetylmuramic acid	3.61863e+07	2.72388e+07	3.75586e+07	3.85149e+07	3.89317e+07	3.27761e+07	1.22703e+08	5.97583e+07	1.92913e+08	199550778	3.9801e+08	1.71022e+08	2.19897e+08	1.66443e+08	126684844	1.65753e+08	5.23977e+07	1.34017e+07	3.20826e+08	3.47733e+07	3.42107e+08
comp.133	Gibberellin A14	7.78361e+06	3.69972e+06	1.31129e+07	1.13137e+07	7.10655e+06	9.85633e+06	1.73662e+07	7.56367e+06	1.4472e+07	2.40547e+07	1.36075e+07	1.23427e+07	3.5215e+07	1.85236e+07	8.89448e+06	1.36289e+07	3.44341e+06	2.6276e+06	1.97032e+07	1.42363e+06	8.04686e+06
comp.134	Nervonic acid	3.29191e+07	3.13009e+07	4.51477e+07	3.03208e+07	5.68842e+07	2.09054e+07	3.68646e+07	3.62712e+07	5.27493e+07	3.48029e+07	6.99451e+07	3.14313e+07	5.93217e+07	2.95302e+07	4.96515e+07	5.81668e+07	5.56178e+07	3.89737e+07	6.3747e+07	6.39517e+07	7.79765e+07
comp.135	Niacinamide	634602	303880	570675	797318	410209	297184	747308	409376	1.08362e+06	909953	1.86119e+06	518062	632908	926473	754520	1.3056e+06	2.12991e+06	488945	825636	377916	2.88892e+07
comp.136	Oleic acid	1637999618	1435967287	2355080196	2195728869	2178112147	1762568113	1635513451	1691536862	2170128910	2464011430	3435851655	2836008189	3228384998	2059828994	3558834094	3304822301	2079648925	1318475055	3910611864	1853109369	5341106515
comp.137	o-Toluidine	4.66033e+06	2.47038e+06	5.35143e+06	5.13114e+06	4.58751e+06	4.27852e+06	6.37956e+06	3.31884e+06	7.38821e+06	8.09366e+06	1.4258e+07	4.49625e+06	1.10223e+07	6.08843e+06	9.58721e+06	1.26837e+07	6.92329e+06	2.18834e+06	4.83959e+06	1.46743e+06	1.76333e+07
comp.138	SM(d18:0/16:0)	2.12094e+07	1.13509e+07	2.27928e+07	2.55048e+07	1.41893e+07	1.35486e+07	9.66487e+06	6.79453e+06	2.1532e+07	2.05153e+07	1.47105e+07	3.43152e+07	3.00509e+07	3.3148e+07	3.20553e+07	2.22201e+07	1.04489e+07	9.2297e+06	9.11854e+06	7.15482e+06	2.07212e+07
comp.139	Palmitoleic acid	9.08517e+06	1.02382e+07	1.04842e+07	1.47761e+07	1.23478e+07	1.11102e+07	4.44262e+07	1.42681e+07	3.50999e+07	3.66828e+07	1.62631e+08	3.1528e+07	6.33974e+07	2.54231e+07	3.17836e+07	3.58097e+07	3.6894e+07	1.96403e+07	5.66653e+07	2.3209e+07	1.95834e+08
comp.140	L-Palmitoylcarnitine	4.26051e+07	1.77798e+07	3.07603e+07	6.72908e+07	4.61971e+07	29780890	3.10408e+07	2.3747e+07	9.98484e+07	7.84161e+07	1.37553e+08	1.65903e+08	3.60515e+08	6.29849e+07	2.33411e+08	5.50167e+08	1.75603e+08	1.12294e+08	6.93673e+07	1.18798e+08	2.01978e+08
comp.141	D-Pantethine	1.01981e+07	3.31923e+06	2.98282e+07	2.71311e+07	8.38039e+06	2.70254e+07	2.12056e+07	1.28101e+07	2.86105e+07	4.52408e+07	1.56519e+08	1.04503e+07	1.21456e+07	3.29098e+07	2.00552e+07	3.64766e+07	8.21693e+06	3.51053e+06	1.34415e+07	2.64942e+07	2.41597e+07
comp.142	PE(15:0/15:0)	4.4644e+07	5.14301e+07	1.16023e+08	1.05915e+08	6.66113e+07	123732258	4.57652e+08	3.55546e+07	2.98747e+08	4.1634e+07	2.59009e+08	385363868	1.8221e+08	3.88174e+08	2.4889e+08	4.99513e+08	1.43208e+08	1.45341e+08	4.06606e+08	9.23174e+08	553420008
comp.143	Pentadecanoic acid	563375	1.67792e+06	4.5417e+06	4.60473e+06	6.09986e+06	3.15309e+06	2.11555e+07	6.02387e+06	1.33673e+07	2.36064e+07	1.76039e+07	1.42975e+07	1.60309e+07	1.26184e+07	1.22563e+06	1.56233e+07	3.77606e+07	1.70832e+07	1.38445e+07	1.89221e+07	3.93744e+07
comp.144	Perilla sugar	2.40708e+07	4.81691e+06	2.83207e+07	2.64089e+07	4.98204e+07	2.9466e+07	2.84838e+07	3.87699e+07	3.21512e+07	4.3511e+07	4.37836e+07	3.42128e+07	6.44592e+07	4.35561e+07	4.6706e+07	7.5188e+07	3.6754e+07	2.10609e+07	5.14377e+07	4.42116e+07	1.02381e+08
comp.145	4a-Carbinolamine tetrahydrobiopterin	5.27532e+06	2.95079e+06	4.76098e+06	4.24941e+06	3.06671e+06	3.65549e+06	2.27132e+06	2.94069e+06	2.43832e+06	2.68434e+06	3.91842e+06	3.82032e+06	3.52237e+06	3.58863e+06	4.70852e+06	280240	1.10245e+07	2.11162e+07	2.24466e+06	1.85055e+07	386223
comp.146	Phytosphingosine	8.97332e+08	471873710	4.67103e+08	5.07293e+08	9.98747e+08	3.95329e+08	1385973154	3.73579e+08	1202820360	1427829618	1615934418	4.81056e+08	420302452	3.24173e+08	7.06907e+08	8.30229e+08	5.39813e+08	3.09907e+08	6.33845e+08	506100408	1340719310
comp.147	Progesterone	3.7397e+06	384265	481765	617513	539873	949590	1.19941e+06	5.77967e+06	2.80469e+06	3.70521e+06	1.93105e+07	713221	3.75837e+06	944155	9.81593e+06	2.44587e+07	1.12597e+06	1.21878e+06	6.61219e+06	738191	1.64277e+07
comp.148	Prostaglandin F1a	674837	73779.8	1.03248e+06	902236	1.57805e+06	1.28206e+06	2.10045e+06	1.39738e+06	1.57437e+06	2.26276e+06	3.57102e+06	3.29149e+06	6.60004e+06	3.52483e+06	1.55391e+06	1.72292e+06	534017	93662.6	1.70429e+06	104248	6.38109e+06
comp.149	9,10-Epoxystearic acid	4.71817e+07	3.5185e+07	5.48406e+07	4.98078e+07	7.39981e+07	3.30477e+07	2302142838	5.71801e+08	1565776366	1427794741	1938728598	1946475942	2765473319	1105759732	7.36603e+08	5.8812e+08	1182922976	4.06754e+08	4497908853	849431228	3806460218
comp.150	Riboflavin	1.39119e+07	9.4912e+06	1.65711e+07	1.35534e+07	1.15999e+07	1.41368e+07	1.33792e+07	1.36003e+07	3.13816e+07	3.11417e+07	5.85802e+07	1.74859e+07	3.46514e+07	2.14562e+07	2.51688e+07	3.11714e+07	1.61609e+07	2.02199e+07	2.35817e+07	2.92507e+07	1.64352e+07
comp.151	Scoparone	1.41013e+07	1.2924e+07	9.68485e+06	7.09189e+06	1.11818e+07	1.07019e+07	1.42024e+07	8.41535e+06	1.10584e+07	1.64395e+07	1.01177e+07	1.24076e+07	1.05781e+07	8.55347e+06	1.54694e+07	1.37574e+07	2.71496e+07	8.70681e+06	1.30477e+07	1.23802e+07	2.37843e+07
comp.152	Octadecanamide	23432126320	6699578642	23393637642	25406986636	37531770973	26005946201	23229332157	30703304047	27517348962	37964434631	36259127314	27121156737	40134556124	38183793223	36922332096	47945465563	24611646943	17685661809	39128000882	40112400883	56566034860
comp.153	7-Sulfocholic acid	2.02618e+07	1.08367e+07	1.30083e+07	2.20423e+07	2.1904e+07	1.23359e+07	1.38979e+06	527236	320937	152393	3.49747e+07	9.92899e+06	2.00949e+06	3.44669e+06	1.70386e+06	2.04817e+07	5.6205e+06	1.13383e+07	506881	1.1846e+07	3.95755e+07
comp.154	Taurocholic acid	2.17882e+06	1.48846e+06	2.56174e+06	2.60518e+06	2.45671e+06	1.59119e+06	2.87153e+06	1.6236e+06	1.40598e+06	1.75814e+06	1.78231e+06	1.56704e+06	1.54647e+06	1.62794e+06	1.61722e+06	2.80269e+06	1.15451e+07	2.37896e+07	2.80393e+06	2.11559e+07	2.46173e+06
comp.155	Tetradecanedioic acid	3.51837e+07	3.70173e+07	6.82768e+07	5.41674e+07	4.1312e+07	5.88962e+07	1.90939e+07	5.32516e+07	6.31876e+07	7.32177e+07	2.62775e+07	4.22616e+07	4.40115e+07	3.04183e+07	2.12566e+07	2.03784e+07	1.1674e+07	191518	7.92631e+07	417439	1.09693e+06
comp.156	Thiamine	1.18535e+08	7.07169e+07	6.57189e+07	4.842e+07	1.04926e+08	6.8227e+07	1.62296e+08	2.08369e+08	1.97462e+08	216068106	5.48816e+08	2.02265e+08	4.83764e+08	3.82669e+08	3.43142e+08	4.27118e+08	1.04214e+08	3.07594e+06	4.92392e+08	4.432e+06	6.48861e+08
comp.157	Thr-Leu	3.50101e+07	6.78086e+07	7.15039e+07	6.94258e+07	3.94747e+07	5.87251e+07	2.23899e+07	1.40339e+07	4.13188e+07	9.5649e+07	1.44196e+07	1.54244e+07	2.00182e+07	4.03144e+07	8.30332e+06	5.22496e+07	5.4759e+07	9.95913e+07	1.89433e+07	7.52782e+07	9.04338e+06
comp.158	Thr-Phe	2.08753e+07	1.19515e+07	2.90015e+07	3.25305e+07	1.83582e+07	1.96112e+07	9.80414e+06	7.51222e+06	2.13634e+07	4.56056e+07	8.99813e+06	1.60711e+07	1.05319e+07	1.72409e+07	7.65149e+06	2.78461e+07	1.40736e+07	2.28164e+07	3.24345e+06	1.22626e+07	8.49666e+06
comp.159	Cinnamaldehyde	1.62455e+07	7.61168e+06	1.58491e+07	1.86228e+07	1.67852e+07	1.27469e+07	2.31778e+06	2.9942e+06	1.69455e+07	1.57832e+07	1.00726e+07	1.67545e+07	1.0701e+07	8.20815e+06	3.04496e+07	2.62978e+07	1.17555e+07	6.52407e+06	2.49862e+07	8.04842e+06	4.88325e+06
comp.160	Traumatic acid	3.47446e+07	4.99801e+07	5.7344e+07	4.20038e+07	3.71819e+07	4.82104e+07	3.77017e+07	5.05209e+07	5.36738e+07	6.81428e+07	3.84551e+07	3.58281e+07	3.96714e+07	3.41975e+07	3.19672e+07	7.27276e+07	2.52543e+07	1.32851e+06	4.03135e+07	2.78808e+06	1.2047e+07
comp.161	Tridemorph	1.34563e+08	3.55938e+07	1.80285e+08	1.52092e+08	2.80097e+08	1.56705e+08	1.64836e+08	2.13825e+08	2.00855e+08	2.92919e+08	2.99496e+08	1.92535e+08	3.61474e+08	2.72176e+08	2.78242e+08	3.88819e+08	7.9859e+07	126516425	3.56921e+08	2.64587e+08	4.82561e+08
comp.162	Uridine diphosphate-N-acetylglucosamine	4.56557e+06	1.90198e+06	772831	405992	1.22058e+06	387231	294437	3.48543e+06	480460	474635	686128	378452	355493	353062	389005	591787	1.15921e+07	2.29352e+07	2.33769e+06	2.26147e+06	428855
comp.163	Uracil	1.13659e+08	1.55848e+07	2.36584e+07	1.99815e+07	1.59724e+07	1.60361e+07	2.67654e+07	2.49912e+07	2.79283e+07	3.12299e+07	2.98627e+07	1.49022e+07	1.72127e+07	1.65669e+07	1.26962e+07	2.15807e+07	3.79681e+08	5.94042e+08	1.45664e+08	5.05642e+08	8.81434e+07
comp.164	L-Urobilin	3.38719e+08	2.23577e+08	4.03201e+08	3.43393e+08	2.45135e+08	4.07495e+08	5.01454e+08	3.45576e+08	7.24824e+08	7.41592e+08	7.89171e+08	9.22224e+07	1.8979e+08	1.33306e+08	4.07143e+08	1600872717	5.32459e+08	1.34025e+07	4.79856e+08	3.21656e+07	9.30439e+08
comp.165	Ursolic acid	3.54876e+08	2.68744e+08	9.97559e+08	1046848067	3.06165e+08	6.56868e+08	5.82031e+07	2.04753e+08	202147947	1.76007e+08	2.02151e+08	4.26587e+08	235317978	2.38773e+08	7.51055e+08	3.28084e+08	103575641	7.75965e+06	4.15577e+08	1.06485e+07	5.53502e+07
comp.166	Val-Leu	5.05841e+07	3.70872e+07	1.01649e+08	1.18408e+08	6.06734e+07	7.07366e+07	2.95294e+07	1.9753e+07	7.79413e+07	192070196	3.60731e+07	5.82148e+07	4.13818e+07	7.65626e+07	2.68719e+07	1.13166e+08	4.14032e+07	6.48449e+07	1.47228e+07	4.23932e+07	2.99699e+07
comp.167	Val-Phe	3.83075e+06	5.24364e+06	8.42464e+06	9.26993e+06	7.15913e+06	6.26415e+06	2.5918e+06	1.82783e+06	5.96306e+06	1.47257e+07	3.25966e+06	5.66808e+06	4.50218e+06	6.85478e+06	1.86896e+06	9.06303e+06	4.19173e+06	7.0752e+06	1.43983e+06	3.83107e+06	2.84993e+06
comp.168	Val-Trp	1.32748e+07	9.00689e+06	1.51997e+07	1.93703e+07	1.66183e+07	1.40723e+07	3.5263e+06	2.91668e+06	1.09423e+07	1.91894e+07	5.71514e+06	6.57366e+06	6.14522e+06	9.81802e+06	4.90022e+06	1.63873e+07	5.69738e+06	1.00244e+07	1.86169e+06	8.62433e+06	2.73458e+06
comp.169	Val-Val	5.80243e+07	8.71263e+07	9.28439e+07	1.03881e+08	6.28846e+07	8.60415e+07	2.16056e+07	1.48309e+07	7.49462e+07	177835327	4.64763e+07	1.43206e+07	4.04456e+07	6.13683e+07	2.21143e+07	7.17201e+07	7.67005e+07	1.4293e+08	2.46855e+07	8.26512e+07	2.39039e+07
comp.170	α-Tocopherol acetate	9.0956e+08	9.52988e+08	3961888596	3277080111	1235970605	2679006411	2.71616e+08	5.58174e+08	1895936585	8.8856e+08	1686119166	2389541964	1931958188	2448671735	2886447968	2198730796	3948048184	1801664510	1800460657	2739510341	5.69988e+08
comp.171	Xanthurenic acid	5.16486e+06	1.25691e+07	1.13652e+07	1.44497e+07	7.23659e+06	1.13654e+07	1.88884e+06	2.06735e+07	9.66402e+06	8.4392e+06	2.67358e+06	9.25134e+06	1.44019e+06	1.98224e+06	4.95392e+06	6.72716e+06	4.76724e+06	1.06664e+06	1.17421e+07	2.31703e+06	594238
comp.172	α-Linolenic acid	1.21494e+08	9.6497e+07	1.8412e+08	1.95088e+08	1.40946e+08	1.6662e+08	1.20226e+08	1.38526e+08	1.49045e+08	1.92406e+08	1.32603e+08	2.20644e+08	1.99371e+08	1.61375e+08	2.3425e+08	166730645	1.88137e+08	1.37805e+08	267958649	1.93404e+08	1.43245e+08
comp.173	3a,6b,7b-Trihydroxy-5b-cholanoic acid	7.67744e+06	2.72155e+06	7.23467e+06	2.17176e+07	4.88182e+07	1.53597e+07	6.51176e+07	3.05232e+07	3.42331e+07	4.31007e+07	6.6537e+07	9.18323e+06	4.60477e+07	1.14239e+07	3.92643e+07	2.61463e+08	5.07273e+07	7.35063e+06	3.40231e+07	1.07033e+07	1.29159e+08
comp.174	(-)-Camphanic acid	7.85687e+06	342418	6.81177e+06	1.7875e+06	455503	1.79589e+06	284041	782371	1.7856e+06	1.95769e+06	837892	841543	1.15621e+06	486410	372500	815808	1.16614e+06	370169	1.05482e+06	3.17079e+06	2.1546e+06
comp.175	(1R,2R,5S,8R,10R,14R)-20-hydroxy-1,2,14,18,18-pentamethyl-17-oxo-8-(prop-1-en-2-yl)pentacyclo[11.8.0.0Â?,Âaâ°.0âµ,âa.0Âaâ´,Âaâa]henicosane-5-carboxylic acid	3.91073e+07	1.17856e+07	1.76083e+07	1.17476e+07	3.18761e+07	9.99251e+06	8.45721e+07	5.37131e+06	8.00582e+06	8.21013e+06	1.21023e+07	8.06222e+06	8.0565e+06	5.79757e+06	8.2491e+06	8.08124e+06	3.1226e+06	1.74125e+06	7.35643e+06	2.37576e+06	3.78282e+06
comp.176	(2E)-3-(4-Hydroxy-3-methoxyphenyl)-N-[2-(1H-indol-3-yl)ethyl]acrylamide	1.71401e+06	7.13768e+06	1.75842e+06	1.79691e+06	642330	980694	59600	274290	319303	352336	210094	358271	123524	96599.9	2.26665e+06	4.79751e+06	2.13872e+06	3.92141e+06	4.18843e+06	3.23357e+06	272401
comp.177	(2E,4E)-N-Isobutyl-2,4-octadecadienamide	1.20441e+08	3.35268e+07	1.38437e+08	1.20152e+08	2.20953e+08	1.22086e+08	1.41897e+08	1.87223e+08	1.55247e+08	2.37587e+08	2.29648e+08	1.41966e+08	2.81291e+08	2.01506e+08	2.41348e+08	3.43718e+08	1.68874e+08	1.03973e+08	2.63548e+08	2.21231e+08	4.42843e+08
comp.178	(2R)-2-[(2R,5S)-5-[(2S)-2-hydroxybutyl]oxolan-2-yl]propanoic acid	1.14346e+08	2.54942e+07	9.67079e+07	5.87451e+07	2.85345e+07	6.57436e+07	3.38283e+07	4.97665e+07	8.21476e+07	7.12829e+07	9.02989e+07	8.78093e+07	1.33908e+08	5.70481e+07	3.04852e+07	7.74702e+07	4.2934e+07	3.05926e+07	7.84609e+07	8.16027e+07	3.81472e+07
comp.179	(2R)-3-{[(2-Aminoethoxy)(hydroxy)phosphoryl]oxy}-2-hydroxypropyl myristate	3.36091e+07	2.07085e+07	7.05926e+07	6.80489e+07	9.42849e+07	5.44174e+07	3.27991e+08	9.9191e+07	2.90232e+08	6.86529e+08	1.24001e+08	1.55045e+08	2.76365e+08	1.71192e+08	2.77677e+07	1.95856e+08	3.94007e+08	2.08864e+08	1.48728e+08	1.69178e+08	4.74084e+08
comp.180	(2S)-2-Hydroxy-3-[(hydroxy{[(1S,2R,3R,4S,5S,6R)-2,3,4,5,6-pentahydroxycyclohexyl]oxy}phosphoryl)oxy]propyl (9Z,12Z)-9,12-octadecadienoate	4.90366e+07	2.00885e+07	3.55665e+07	4.26158e+07	1.97226e+07	1.02724e+07	1.2697e+07	6.59447e+06	2.1599e+07	7.55842e+06	2.69103e+07	1.39844e+07	3.82035e+07	4.5991e+07	4.46044e+07	2.6063e+07	2.09031e+07	4.10712e+07	3.76824e+07	1.14966e+07	3.42988e+07
comp.181	(2S)-4-(Methylsulfanyl)-2-{[(2S)-2-pyrrolidiniumylcarbonyl]amino}butanoate	8.76746e+06	1.3088e+07	1.14513e+07	1.28457e+07	1.28571e+07	7.25965e+06	973178	1.00451e+06	1.40034e+06	4.03504e+06	1.26835e+06	3.1534e+06	1.74122e+06	1.27835e+06	613211	3.58597e+06	3.09109e+06	4.45476e+06	937614	3.55882e+06	382938
comp.182	(3beta,5alpha)-20-Oxopregnan-3-yl hydrogen sulfate	840287	842582	1.13385e+06	998457	1.79526e+06	793039	647025	723630	730905	1.31237e+06	5.66476e+07	1.90276e+06	1.11627e+06	1.12783e+06	5.36701e+06	1.58229e+07	9.193e+06	648742	8.18805e+06	1.40117e+06	9.36257e+07
comp.183	(3beta,5xi,9xi)-28-Hydroxy-28-oxoolean-12-en-3-yl beta-D-galactopyranosyl-(1-3)-[beta-D-glucopyranosyl-(1-2)]-beta-D-glucopyranosiduronic acid	1.80998e+06	4.34253e+06	2.50103e+06	1.90966e+06	524180	491415	676853	427274	324623	458501	399589	3.63163e+06	273018	710857	436312	725879	9.356e+06	3.45884e+07	2.83893e+06	3.58104e+07	597333
comp.184	(3beta,5xi,9xi,18xi)-3,19-Dihydroxyurs-12-ene-24,28-dioic acid	4.03509e+07	1.46219e+07	3.87101e+07	3.38106e+07	4.6944e+07	2.55333e+07	2.54397e+07	1.95343e+07	5.12163e+07	5.25909e+07	5.03253e+07	8.96339e+07	1.13109e+08	5.27367e+07	2.44015e+07	3.91175e+07	1.17711e+07	2.83099e+06	5.41747e+07	4.6464e+06	3.90295e+07
comp.185	(3-Oxo-2,3-dihydro-4H-1,4-benzoxazin-4-yl)acetic acid	2.05831e+08	2.09106e+08	2.68507e+08	2.61464e+08	207820371	252131359	3.28482e+08	3.19159e+08	3.57502e+08	4.69217e+08	1.69489e+08	3.37077e+08	3.44906e+08	269872307	1.23273e+08	1.69449e+08	1.70615e+08	1.47584e+07	392688839	2.3948e+07	9.51551e+07
comp.186	(3β,5ξ,9ξ,18ξ)-22-Hydroxyolean-12-en-3-yl 6-deoxy-α-L-mannopyranosyl-(1->2)hexopyranosyl-(1->2)-β-D-glucopyranosiduronic acid	1.28683e+06	3.13658e+06	3.76151e+06	2.17038e+06	760198	344824	218015	1.15102e+06	167004	194014	340871	5.48219e+06	559435	232912	272414	267232	5.64448e+06	1.02103e+07	990921	8.04321e+06	468306
comp.187	(4Z,7Z,10Z,13Z,16Z)-18-[(2S,3R)-3-Ethyl-2-oxiranyl]-4,7,10,13,16-octadecapentaenoic acid	9.34098e+06	4.34148e+06	1.50789e+07	1.16498e+07	1.26189e+07	1.59007e+07	1.61994e+08	1.54806e+07	5.3508e+07	4.90235e+07	1.24005e+08	7.84092e+07	1.33123e+08	7.06131e+07	1.21121e+08	1.59661e+08	1.01454e+08	6.88591e+06	2.33353e+08	9.25079e+06	1.41359e+08
comp.188	(5E)-7-methylidene-10-oxo-4-(propan-2-yl)undec-5-enoic acid	1.59413e+08	6.70903e+07	2.33658e+08	2.09457e+08	2.07585e+08	2.50092e+08	1.4454e+08	3.40867e+08	292331251	280514012	2.53076e+08	3.78512e+08	4.39001e+08	333758802	2.65709e+08	2.39655e+08	1.13491e+08	1.79973e+06	7.12995e+08	3.49594e+06	3.49757e+07
comp.189	(5Z,8Z)-10-{3-[(2Z,5Z)-2,5-Octadien-1-yl]-2-oxiranyl}-5,8-decadienoic acid	1.53726e+06	762830	4.92609e+06	3.4969e+06	5.90893e+06	3.51944e+06	1.16921e+07	2.83696e+06	3.62573e+06	5.09018e+06	1.21236e+07	611363	673250	4.9903e+06	1.0776e+07	1.32496e+07	1.70685e+06	2.65819e+06	1.07267e+06	3.47852e+06	2.24708e+07
comp.190	(5Z,8Z,11S,12R,14Z)-11,12-Dihydroxy-5,8,14-icosatrienoic acid	3.9305e+07	9.76831e+06	4.95178e+07	5.70255e+07	7.03453e+07	5.355e+07	6.18433e+07	5.81071e+07	9.82311e+07	6.63093e+07	3.33748e+07	5.2385e+07	1.10382e+08	7.39829e+07	9.6272e+07	5.77545e+07	8.82483e+07	1.76518e+07	1.43131e+08	4.18425e+07	4.24979e+08
comp.191	(9Z,12E)-Tetradecadienol	7.57669e+07	2.59078e+07	5.42225e+07	6.49544e+07	7.71092e+07	4.25995e+07	2.11317e+07	1.7342e+07	8.09804e+07	8.86809e+07	1.31155e+08	7.73002e+07	8.39216e+07	5.73394e+07	2.25595e+08	2.38928e+08	2.52246e+07	1.45741e+07	7.45065e+07	2.87431e+07	1.81873e+08
comp.192	[4-(Methylamino)phenyl]acetic acid	1.45741e+06	648294	1.32274e+06	1.17986e+06	1.17808e+06	1.066e+06	1.1468e+06	1.04851e+06	1.41556e+06	1.53144e+06	5.95539e+06	1.84259e+06	1.50655e+06	1.44006e+06	951236	2.44321e+06	1.0592e+06	702020	874403	1.06839e+06	1.69906e+07
comp.193	1-(2-Benzyloxy-phenyl)-piperazine	2.92877e+07	5.61464e+06	3.78505e+07	3.59143e+07	6.37133e+07	3.95705e+07	3.70707e+07	5.79233e+07	4.2364e+07	6.10312e+07	6.84093e+07	4.97833e+07	9.06991e+07	5.93602e+07	6.35127e+07	8.1098e+07	52056567	3.27219e+07	7.79097e+07	6.81155e+07	1.41885e+08
comp.194	1-(4-Piperidinyl)ethanol	5.3644e+07	7.88884e+06	6.91843e+07	6.5201e+07	1.53191e+08	6.55589e+07	5.88441e+07	9.60473e+07	7.86361e+07	9.14066e+07	9.76887e+07	1.00721e+08	1.35054e+08	8.32394e+07	9.04055e+07	1.01087e+08	1.10438e+08	7.22493e+07	1.29751e+08	6.49048e+07	1.73432e+08
comp.195	1,2,3,4-Tetramethyl-1,3-cyclopentadiene	4.94313e+07	2.2559e+07	6.61498e+07	5.87527e+07	7.18065e+07	5.31232e+07	7.73062e+07	70037235	5.02276e+07	2.86256e+07	6.40594e+07	4.60673e+07	9.57225e+07	6.23825e+07	5.0667e+07	1.00731e+08	5.23479e+07	4.53635e+07	6.39512e+07	7.44742e+07	1.21656e+08
comp.196	1,2-Dilinoleoylglycerol	1464920309	1182602419	1830834904	1747440175	5.78066e+08	8.52645e+08	9.82825e+08	392493794	7.77277e+08	1179052809	1870784081	2056884045	2205479855	1694646665	2299913719	3797599967	2184216447	1222268778	8.38892e+08	1954155972	1210883408
comp.197	1,5-Isoquinolinediol	1169977787	1054408782	1140306258	1166910186	1001697249	1099046405	6.76436e+08	1503328970	1812441898	1750122627	1501283036	813283715	366887817	4.25632e+08	1308592238	1438132976	1295285324	4.13676e+08	1935716374	532199666	1.54101e+08
comp.198	12-hydroxyjasmonic acid	1.767e+07	6.92003e+06	2.14384e+07	1.66669e+07	1.61349e+07	2.12373e+07	2.62562e+07	2.62597e+07	2.5527e+07	2.54942e+07	2.14878e+07	2.87463e+07	3.88433e+07	2.36973e+07	1.20915e+07	1.97833e+07	4.53386e+06	743801	2.41681e+07	342456	6.65716e+06
comp.199	12-Methyl-8-oxapentacyclo[14.2.1.0~1,13~.0~4,12~.0~5,9~]nonadeca-5(9),6,10-trien-17-one	1.5454e+07	2.27387e+06	8.60251e+06	1.24314e+07	2.44627e+07	1.76448e+07	1.60437e+07	1.52081e+07	2.39974e+07	2.11671e+07	2.61384e+07	2.1583e+07	2.68265e+07	2.21337e+07	1.51629e+07	4.63307e+07	1.64392e+07	1.3329e+07	2.68964e+07	3.23922e+07	3.89829e+07
comp.200	14,16-dihydroxy-3-methyl-3,4,5,6,7,8,9,10-octahydro-1H-2-benzoxacyclotetradecine-1,7-dione	3.98768e+07	1.26099e+07	3.31957e+07	2.64159e+07	1.66348e+07	1.98425e+07	3.79519e+06	3.21363e+07	6.04577e+07	5.33429e+07	2.95094e+07	3.31786e+07	2.24229e+07	1.16148e+07	3.25538e+07	2.53541e+07	387211259	7.54782e+07	6.63057e+07	1.01198e+08	3.3011e+07
comp.201	15-OxoEDE	5.68577e+07	1.22421e+07	9.22098e+07	7.07234e+07	135666647	6.4197e+07	9.1353e+07	1.02017e+08	1.08181e+08	8.6127e+07	1.27674e+08	8.69113e+07	1.91621e+08	8.90778e+07	7.98464e+07	2.18744e+08	7.87428e+07	6.26182e+07	1.00789e+08	1.32064e+08	2.27497e+08
comp.202	1-Formylproline	7.59412e+06	2.34283e+06	8.41427e+06	5.60223e+06	4.3864e+06	4.19816e+06	5.69294e+06	4.26084e+06	1.13056e+07	1.13589e+07	2.96168e+07	8.04248e+06	14891807	8.32759e+06	5.22521e+06	8.78569e+06	5.68411e+06	4.07759e+06	9.61235e+06	2.55744e+07	2.13025e+07
comp.203	2-(Butyryloxy)-3-(hexadecyloxy)propyl 2-(trimethylammonio)ethyl phosphate	4.26599e+07	4.50261e+07	4.17286e+07	4.03313e+07	4.22064e+07	3.6057e+07	5.2365e+07	2.87986e+07	3.80872e+07	3.59084e+07	8.73327e+07	5.56687e+07	4.91821e+07	3.77819e+07	6.16003e+07	8.1478e+07	8.2388e+07	5.4188e+07	3.58634e+07	1.08804e+08	1.89491e+08
comp.204	2,2'-Methylenebis(4-methyl-6-tert-butylphenol)	23157603395	10999395281	5259021600	28532187365	44274491641	24825889341	23835903654	35726242862	25070209263	33721804074	31120301444	21108773064	46340196852	35439140464	39314801408	47303007521	25282576770	19046527326	37230818552	35508223910	62746488038
comp.205	2,4-di(4-hydroxyphenyl)cyclobutane-1,3-dicarboxylic acid	8.70808e+06	1.61593e+06	2.91157e+06	2.61497e+06	1.37397e+07	4.32866e+06	5.65552e+07	1.77975e+07	4.83042e+07	1.23903e+08	3.4025e+07	8.42496e+06	3.19966e+07	1.75585e+07	5.4333e+06	2.5969e+07	8.23699e+06	420445	4.53939e+07	708426	3.67048e+07
comp.206	2,4-Dimethylnicotinic acid	5.1405e+06	6.48656e+06	4.15002e+06	6.27659e+06	6.34501e+06	4.32371e+06	4.76841e+07	8.49294e+06	2.74111e+07	3.49144e+07	8.93957e+07	1.79442e+07	6.06489e+07	2.67584e+07	3.72917e+07	1.89802e+07	6.55662e+06	6.30649e+06	3.50691e+07	4.81281e+06	7.33019e+07
comp.207	2-Hydroxybenzothiazole	1.2174e+07	1.45497e+07	4.37045e+06	5.71992e+06	1.00222e+07	5.81237e+06	2.07949e+07	7.33941e+06	5.65861e+06	1.16984e+07	5.42545e+06	6.67926e+06	6.95827e+06	7.52147e+06	8.91266e+06	7.00463e+06	9.42142e+06	9.85904e+06	5.54891e+06	9.38811e+06	1.13772e+07
comp.208	2-Hydroxyquinoline	2.8118e+07	1.66557e+07	3.29339e+07	3.09494e+07	2.83624e+07	2.71945e+07	1.08558e+07	2.26693e+07	3.44963e+07	3.65257e+07	2.92906e+07	3.33322e+07	2.77168e+07	2.46201e+07	3.17918e+07	3.40171e+07	1.36376e+07	3.1459e+06	3.38419e+07	4.90515e+06	8.41736e+06
comp.209	3-(3-pyridinyl)propanoic acid	5.88978e+06	7.71474e+06	1.35008e+07	1.41746e+07	8.65728e+06	1.15043e+07	6.42963e+06	1.49731e+07	1.46881e+07	9.41031e+06	1.6525e+07	1.20183e+07	8.72347e+06	2.09638e+07	2.15712e+07	3.19415e+07	1.21814e+07	1.36361e+07	2.02969e+07	1.34786e+07	1.59262e+07
comp.210	3-(benzylamino)propanamide	8.76055e+06	1.61459e+06	1.20921e+07	9.92898e+06	1.72271e+07	9.16743e+06	1.1468e+07	1.50096e+07	1.35669e+07	1.53329e+07	1.71776e+07	1.47004e+07	2.47124e+07	1.57922e+07	1.5712e+07	2.77931e+07	1.66716e+07	9.6979e+06	2.15518e+07	1.63143e+07	3.81075e+07
comp.211	3,3-Dimethylcyclohexanone	1.18976e+08	3.80749e+08	143690551	5.73299e+07	1.65804e+07	5.30707e+07	1.26616e+07	1.22903e+07	2.68902e+07	2.09328e+07	5.65858e+07	7.52871e+07	7.12698e+07	2.8841e+07	2.53514e+07	3.58401e+07	5.50192e+06	1.272e+07	1.00742e+07	3.40037e+07	1.35589e+07
comp.212	3-amino-2-phenyl-2H-pyrazolo[4,3-c]pyridine-4,6-diol	2.55097e+07	1.83646e+06	5.681e+06	6.70562e+06	1.20785e+07	9.48265e+06	5.1612e+07	2.96119e+07	6.17491e+07	5.80397e+07	7.65178e+07	1.38054e+07	2.68522e+07	1.15327e+07	9.27008e+07	5.26689e+07	2.12992e+07	3.29648e+06	3.57763e+07	9.30886e+06	1.58975e+08
comp.213	3-Phenylbut-2-enoic acid	2.88943e+07	1.96142e+07	2.51641e+07	2.84775e+07	4.01004e+07	1.9236e+07	1.94842e+07	2.04162e+07	2.85378e+07	3.40854e+07	2.35341e+07	24549041	3.46153e+07	3.71002e+07	3.57568e+07	4.49093e+07	3.06566e+07	1.57696e+07	3.36934e+07	3.23682e+07	6.44866e+07
comp.214	3-tert-Butyladipic acid	3.48427e+08	1.51494e+08	358589448	2.33859e+08	1.77639e+08	2.6549e+08	1.78493e+08	2.99413e+08	4.16646e+08	4.29096e+08	3.96019e+08	4.90058e+08	6.42387e+08	3.05433e+08	2.40785e+08	4.12445e+08	1.38588e+08	2.54355e+07	5.28899e+08	8.96813e+07	5.42983e+07
comp.215	4-(3,4-dimethoxyphenyl)-3-methyl-1H-pyrazol-5-amine	4.60901e+06	3.34479e+06	5.27561e+06	5.56074e+06	4.91748e+06	6.32858e+06	6.87301e+06	6.87328e+06	6.51012e+06	7.2846e+06	5.44204e+06	9.87146e+06	1.16513e+07	7.68214e+06	3.99854e+06	5.91712e+06	3.18272e+06	979790	1.14115e+07	1.25321e+06	1.82659e+06
comp.216	4-(5,7-Dihydroxy-4-oxo-4H-chromen-3-yl)phenyl beta-D-glucopyranosiduronic acid	373305	95054.2	118978	88859.9	161908	91221.5	72614.3	60877.9	78470.1	153021	115449	103939	117487	92663.4	118789	145099	1.0163e+07	2.01141e+07	1.84288e+06	1.97588e+07	140846
comp.217	4-(7-Hydroxy-4-oxo-4H-chromen-3-yl)phenyl hydrogen sulfate	7.52435e+06	211823	9.22061e+06	1.00792e+06	127159	132765	98076.7	299132	246380	460520	569454	1.58675e+06	1.12959e+06	1.55885e+07	1.36412e+07	296762	8.11099e+08	1770966705	1.49415e+08	1998480941	563138
comp.218	4-(Diethylamino)benzaldehyde	1.12737e+07	3.29133e+06	1.43965e+07	1.3205e+07	2.43957e+07	17172836	1.24808e+07	2.36762e+07	1.69193e+07	2.6201e+07	2.52008e+07	2.16925e+07	3.7938e+07	2.56273e+07	2.98481e+07	3.24427e+07	2.01412e+07	1.28023e+07	2.98014e+07	2.93733e+07	5.80708e+07
comp.219	4,8-Dihydroxy-7-(hydroxymethyl)-6-methoxy-3,4-dihydro-1(2H)-naphthalenone	1.24723e+07	8.75677e+06	2.03896e+07	3.13872e+07	5.26434e+06	1.99735e+07	983926	2.35049e+06	4.50017e+06	1.13039e+06	332578	600362	374387	655944	1.93583e+06	417761	3.89607e+06	1.53e+06	2.17232e+06	1.12304e+06	2.60124e+06
comp.220	4-[2-(2,3-Dihydroxy-5,6,8a-trimethyloctahydro-2H-spiro[naphthalene-1,2'-oxiran]-5-yl)ethyl]-5-hydroxy-2(5H)-furanone	1.12224e+06	586806	1.10214e+06	1.83172e+06	7.95269e+06	1.67031e+06	1.99442e+07	3.16705e+06	3.06167e+07	2.78206e+07	3.24001e+07	2.27504e+07	1.50072e+07	2.24516e+07	1.86684e+07	3.92481e+07	3.42764e+07	3.82444e+06	3.67894e+07	2.04153e+06	1.45889e+08
comp.221	4-Hydroxyindole	3.46697e+07	3.35342e+07	3.83134e+07	3.48733e+07	3.07134e+07	3.26189e+07	2.29949e+07	4.54342e+07	5.26384e+07	5.75631e+07	4.5287e+07	3.41143e+07	1.8761e+07	1.8127e+07	4.40979e+07	4.38864e+07	3.9752e+07	1.27418e+07	6.54552e+07	17060668	8.17734e+06
comp.222	4-Methyl-1-piperazine acetic acid	2.12449e+07	3.0054e+07	1.62871e+07	2.43048e+07	1.61028e+07	1.01537e+07	1.14822e+07	5.11348e+06	9.82925e+06	2.04311e+07	1.30966e+07	7.28883e+06	6.43205e+06	6.37907e+06	3.90913e+06	1.31946e+07	1.15815e+07	1.67032e+07	6.56767e+06	6.43219e+06	2.72476e+06
comp.223	4-Methylumbelliferyl-α-D-glucopyranoside	755383	541599	575330	535399	235435	281196	175280	201230	211074	238518	345052	217994	234591	304129	226888	212672	6.49349e+06	1.06466e+07	1.51431e+06	1.15534e+07	162756
comp.224	5,7-Dihydroxy-2-(4-hydroxyphenyl)-4-oxo-4H-chromen-3-yl 2-O-hexopyranosylhexopyranoside	314305	1.51321e+06	684453	451712	144794	189682	97103.4	99228	86936.1	123058	222880	130183	309671	128959	1.69583e+06	123447	1.09925e+07	2.03416e+07	2.28536e+06	2.125e+07	172921
comp.225	5-Oxoprolylproline	1.18403e+08	6.03526e+07	3.63742e+07	2.27086e+07	2.1953e+07	2.04069e+07	4.97993e+07	2.72268e+07	4.82753e+07	8.03641e+07	2.93058e+07	1.0693e+07	1.72857e+07	1.34759e+07	6.77643e+06	4.84437e+07	1.52503e+07	3.05276e+07	1.35058e+07	9.53019e+06	5.24811e+06
comp.226	6β-Naltrexol-d3	6.10827e+06	5.20028e+06	3.49669e+06	3.7919e+06	1.20224e+07	2.85243e+06	7.03468e+06	4.84639e+06	1.10756e+07	1.09072e+07	4.5748e+06	2.7751e+06	4.5985e+06	4.42098e+06	4.95069e+06	1.02368e+07	3.54956e+06	3.0604e+06	3.4826e+06	2.8427e+06	1.20258e+07
comp.227	6''-Malonylgenistin	363409	391366	9.30536e+06	375238	211095	436090	220775	199096	260597	277148	3.18915e+06	1.02288e+06	810916	1.92762e+06	3.22099e+06	2.18524e+06	1.86972e+07	3.8453e+07	1.39328e+06	3.65994e+07	6.22246e+06
comp.228	6-Phenoxynicotinic acid	8.24002e+07	2.811e+07	1.19878e+08	119116847	1.71862e+08	1.07168e+08	147668463	2.39899e+08	1.62402e+08	1.64863e+08	157601812	1.07289e+08	2.32297e+08	1.62195e+08	1.4093e+08	2.49751e+08	1.42224e+08	7.70682e+07	1.86196e+08	114931505	2.85279e+08
comp.229	6β-Prostaglandin I1	6.06443e+06	6.09938e+06	1.34483e+07	1.17068e+07	1.17491e+07	1.20663e+07	5.01839e+06	5.52425e+06	2.59726e+07	3.00546e+07	7.52426e+06	5.07013e+06	1.42346e+07	5.00991e+06	4.09914e+06	1.2456e+07	1.04823e+07	2.58401e+06	1.18237e+07	2.3908e+06	1.5071e+07
comp.230	7-Methyl-2-phenylquinoline-4-carboxylic acid	1.12218e+06	200803	515588	309192	376984	267734	382886	250543	418066	500524	659413	321329	467346	342652	433492	823871	2.11387e+06	6.65049e+06	472355	2.05415e+07	722176
comp.231	8-Iso-15-keto-prostaglandin-F2	2.67726e+06	1.7296e+06	2.68316e+06	2.24763e+06	2.90405e+06	2.18212e+06	3.89944e+06	2.13154e+06	1.19248e+07	1.23678e+07	2.10376e+07	1.1391e+07	1.59635e+07	1.08226e+07	1.18729e+07	1.65808e+07	2.01555e+07	351968	1.45501e+07	325060	6.32113e+07
comp.232	9(Z),11(E),13(E)-Octadecatrienoic Acid methyl ester	4.76291e+08	4.2633e+08	7.08971e+08	533527500	2.10887e+08	3.72136e+08	1.97171e+08	1.78672e+08	5.97021e+08	233075696	4.71322e+08	1067887893	4.83342e+08	6.45976e+08	908333146	3.72519e+08	7.81504e+08	4.53155e+08	2.88283e+08	328459043	1.09151e+08
comp.233	α-Amino-2-Indanacetic Acid	1.66601e+06	1.92239e+06	2.34946e+06	3.40661e+06	2.78851e+06	3.7209e+06	4.22202e+06	6.99524e+06	1.32044e+07	8.33531e+06	8.60068e+06	1.41754e+06	1.07865e+06	2.39133e+06	4.97172e+06	2.1251e+07	3.687e+06	553748	3.93486e+06	582142	6.23173e+06
comp.234	α-Methylene-gamma-butyrolactone	5.85361e+07	7.94426e+06	4.73943e+07	2.091e+07	2.86883e+07	2.34537e+07	1.10995e+07	1.13851e+07	1.82998e+07	3.30415e+07	2.72222e+07	2.70456e+07	3.44962e+07	2.71203e+07	2.0916e+07	3.35469e+07	1.63688e+07	7.57596e+06	1.88228e+07	2.98079e+07	4.22222e+07
comp.235	Arachidonoyl amide	2.12255e+07	4.55636e+06	2.52905e+07	2.27846e+07	4.74754e+07	2.69921e+07	2.80589e+07	3.51876e+07	3.4768e+07	4.29434e+07	4.3303e+07	3.02102e+07	5.59678e+07	4.52619e+07	3.9348e+07	7.25446e+07	4.12139e+07	2.22557e+07	5.06181e+07	4.77125e+07	1.05926e+08
comp.236	Arachidonyl trifluoromethyl ketone	7.41723e+07	2.50815e+07	7.42444e+07	8.03963e+07	1.42308e+08	9.01379e+07	6.88368e+07	1.44365e+08	7.02977e+07	8.00585e+07	4.06903e+07	4.48882e+07	6.42866e+07	8.34859e+07	6.89475e+07	9.2296e+07	6.32064e+07	7.42561e+07	6.08678e+07	1.14379e+08	5.71811e+07
comp.237	Cer-BDS d34:0; Cer-BDS d17:0/17:0; [M+FA-H]	4.66857e+07	3.95075e+07	8.27999e+07	9.56357e+07	1.57805e+08	4.92914e+07	1.8505e+08	4.79893e+07	2.15142e+08	1.86401e+08	3.11998e+08	2.33032e+08	2.08572e+08	1.35543e+08	1.61285e+08	1.80578e+08	8.33972e+07	1.25332e+08	2.67507e+08	2.87765e+08	1.96612e+08
comp.238	Cer-NS d34:1; Cer-NS d18:1/16:0; [M+H]	8.47492e+08	6.07511e+08	1393164079	1380673545	1060237631	1048996505	9.65685e+08	688734792	1492285383	1294356866	2575561527	2900843915	2274347589	2038964934	2106037121	2473631723	1292860403	8.76507e+08	1209848777	1506173038	2986310326
comp.239	cis-12-Octadecenoic acid methyl ester	1.13342e+08	7.06454e+07	1.57054e+08	1.04768e+08	8.14912e+07	8.98678e+07	8.38875e+07	7.2727e+07	1.38247e+08	7.68091e+07	1.93241e+08	2.37817e+08	1.96998e+08	1.8353e+08	2.68869e+08	2.15886e+08	1.42419e+08	1.47957e+08	9.26864e+07	1.19306e+08	9.15602e+07
comp.240	Curvularin	3.17343e+06	523277	3.23801e+06	2.76395e+06	1.46236e+06	1.53246e+06	254586	800852	8.33353e+06	7.13723e+06	2.93117e+06	3.34778e+06	2.60027e+06	1.04174e+06	2.32245e+06	2.92235e+06	6.54248e+07	5.23933e+06	2.07511e+06	8.80617e+06	1.40562e+07
comp.241	Cyclic adenosine diphosphate ribose	4.54153e+06	1.21618e+06	4.15943e+06	1.60643e+06	647107	2.01974e+06	2.11995e+07	1.27805e+06	616793	704224	1.7452e+06	2.17693e+06	882727	1.52138e+06	1.55187e+06	1.15459e+07	569716	2.04926e+06	1.33937e+06	663295	865368
comp.242	Decanamide	1.14111e+07	2.19942e+06	1.32143e+07	1.44001e+07	2.21378e+07	1.39901e+07	1.47363e+07	1.52715e+07	1.59566e+07	2.22696e+07	2.12177e+07	1.57907e+07	3.14501e+07	1.99788e+07	2.07937e+07	3.5894e+07	1.87195e+07	8.87297e+06	2.05479e+07	1.73229e+07	4.93479e+07
comp.243	Dibenzylamine	7.30315e+08	1.48516e+08	687079809	8.80718e+08	1643865694	9.0239e+08	8.08723e+08	1188464655	1095682445	1503559746	1317202070	9.74861e+08	2032668907	1505608077	1681201951	2526052207	8.89943e+08	6.51424e+08	1561170594	1350152150	3146485077
comp.244	Dihomo-γ-Linolenic Acid	4.62763e+08	3.13162e+08	4.81741e+08	503924737	7.93546e+08	3.68511e+08	6.69649e+08	3.16222e+08	7.12902e+08	1079097938	2869642023	1423086527	1326526515	7.54584e+08	1490159372	1374064962	6.79734e+08	230520316	1256985957	3.14964e+08	4895000709
comp.245	Stachydrine	1069412670	336045446	7.94602e+08	3.60628e+08	2.59643e+08	4.75407e+08	4.52007e+08	3.54105e+08	5.31022e+08	559638233	4.05801e+08	7.30511e+08	7.64494e+08	608635136	4.05413e+08	4.05978e+08	2.75119e+08	2.14544e+08	5.32566e+08	4.92574e+08	5.24197e+08
comp.246	Docosahexaenoic acid ethyl ester	1033415723	475457734	8.11939e+08	1450406875	3375745917	1646793590	5132552149	1949600052	2348707096	2732792415	6131107116	1259341200	1894250683	1252190253	4982891811	4633019007	3303421649	2.90808e+07	2468911900	3.28702e+07	11827100012
comp.247	Docosahexaenoic acid methyl ester	3.42125e+07	1.94707e+07	6.05515e+07	1.00923e+08	8.1974e+07	1.39185e+08	1.69921e+08	6.60962e+07	1.12658e+08	1.35594e+08	1.11212e+08	2.60933e+07	2.64128e+07	4.09624e+07	6.12161e+07	1.40427e+08	8.8144e+07	1.82693e+07	4.8887e+07	2.39681e+07	1.80622e+08
comp.248	Eicosapentaenoic acid methyl ester	1.12163e+07	2.60585e+06	2.17914e+07	1.37754e+07	1.74548e+07	4.11864e+07	1.5123e+07	5.37301e+07	4.32075e+07	4.57816e+07	5.43778e+07	1.67257e+07	4.07473e+07	2.59925e+07	5.49105e+07	1.17978e+08	5.77293e+07	1.51852e+07	6.74203e+07	3.53498e+07	5.11007e+07
comp.249	Ethyl palmitoleate	4.44044e+07	4.02329e+07	4.4691e+07	3.0419e+07	6.88333e+07	4.18683e+07	4.19999e+08	1.07447e+08	3.9679e+08	4.45856e+08	1206250015	4.10651e+08	1012873364	3.02088e+08	2.84091e+08	2.43263e+08	180892668	4.98627e+07	5.97525e+08	8.52982e+07	2478245846
comp.250	Ethyldiethanolamine	6.67584e+07	6.43046e+07	6.45875e+07	9.15953e+07	2.50712e+08	8.85306e+07	7.98818e+07	1.17194e+08	1.61564e+08	105211909	1.11024e+08	9.82123e+07	1.4843e+08	1.35243e+08	1.08781e+08	1.88938e+08	1.64083e+08	1.51836e+08	2.02947e+08	1.97648e+08	3.27728e+08
comp.251	Friedelin	1.02198e+06	1.43479e+06	2.38629e+06	1.48166e+06	2.17674e+06	1.7605e+06	3.08948e+06	2.06302e+06	4.17583e+06	4.07762e+06	6.81548e+06	5.15453e+06	7.05037e+06	6.33565e+06	6.38423e+06	1.09246e+07	2.58699e+06	1.601e+06	7.62893e+06	2.61868e+06	1.00855e+07
comp.252	Genistein 4'-O-glucuronide	255057	189983	210681	274356	439767	260372	213434	184897	238178	406291	306637	257996	342475	358871	386224	492762	1.4715e+07	3.04887e+07	2.49655e+06	3.02939e+07	649425
comp.253	Glycerophospho-N-palmitoyl ethanolamine	2.10064e+06	1.38406e+06	1.1937e+06	3.36199e+06	2.51826e+06	2.06219e+06	3.06408e+06	2.06183e+06	2.74568e+06	3.23449e+06	3.67161e+06	4.47995e+06	6.42147e+06	5.91569e+06	2.3194e+06	3.47487e+06	9.82852e+06	7.73259e+06	2.63278e+06	4.72472e+06	5.37165e+06
comp.254	Gly-Gly-Leu	1.34469e+07	1.34783e+07	1.69394e+07	1.74947e+07	9.45953e+06	1.22016e+07	2.30342e+06	4.35017e+06	8.59189e+06	1.17049e+07	3.15308e+06	7.74042e+06	3.98176e+06	6.24959e+06	2.25359e+06	1.00808e+07	1.00279e+07	1.82633e+07	2.98521e+06	1.08266e+07	867840
comp.255	GU5140000	1.27087e+07	1.76027e+06	1.41434e+07	1.42997e+07	3.30557e+06	6.17843e+06	2.13523e+06	5.9002e+06	3.82702e+06	3.57012e+06	1.43221e+07	1.08814e+07	1.26297e+07	3.88444e+06	3.07678e+07	2.34409e+07	1.05271e+07	5.05326e+06	9.21771e+06	1.88408e+07	3.76312e+07
comp.256	icos-19-ene-1,2,4-triol	1.74632e+06	1.62147e+06	2.1328e+06	2.09664e+06	2.37994e+06	1.63553e+06	2.94047e+06	1.15396e+06	4.2248e+06	3.4987e+06	7.86878e+06	4.32194e+06	7.46303e+06	4.74789e+06	3.60163e+06	2.94912e+06	1.54908e+06	764070	5.245e+06	1.35602e+06	5.41466e+06
comp.257	Linoleyl alcohol	1.75867e+08	152795787	1.00372e+08	1.76397e+08	2.52217e+08	1.75026e+08	102595782	1.60081e+08	1.58329e+08	2.41175e+08	1.77491e+08	1.01711e+08	2.23839e+08	2.26862e+08	2.3785e+08	2.68273e+08	1.65088e+08	1.0735e+08	2.1498e+08	2.25529e+08	2.7586e+08
comp.258	LPE 12:0; [M-H]	761433	1.79654e+06	1.64036e+06	707995	1.25508e+06	1.48639e+06	1.23674e+06	2.22728e+06	7.56402e+06	8.16361e+06	8.904e+06	2.03083e+06	5.3605e+06	1.16144e+07	3.45293e+06	1.61833e+07	1.30353e+06	948689	6.58094e+06	1.67602e+06	3.44936e+06
comp.259	LPE 13:0; [M-H]	5.00235e+06	2.00108e+06	1.2083e+07	1.09617e+07	1.01941e+07	9.58562e+06	1.98617e+07	7.45473e+06	2.17637e+07	5.73555e+07	1.38778e+07	1.2094e+07	2.49156e+07	1.94824e+07	7.8708e+06	3.01625e+07	4.92466e+07	4.3461e+07	1.85589e+07	2.99047e+07	5.91445e+07
comp.260	LPE 19:1; [M-H]	495518	402121	566058	509519	1.24915e+06	420039	7.39424e+06	369531	499167	704054	1.38997e+07	500423	1.02734e+06	486209	434934	558896	1.71138e+07	1.77012e+07	6.11427e+06	1.35971e+07	1.04417e+07
comp.261	Metamfepramone	1.00567e+07	2.61131e+06	1.54843e+07	1.62219e+07	2.12678e+07	1.42386e+07	11616122	2.25429e+07	3.16167e+07	2.8094e+07	1.47719e+07	1.91057e+07	3.8442e+07	1.79724e+07	2.73828e+07	3.73581e+07	1.35434e+07	7.42582e+06	1.44838e+07	2.33115e+07	5.86259e+07
comp.262	Methyl (4S)-4-isopropenyl-1-cyclohexene-1-carboxylate	7.58793e+07	3.54852e+06	6.39279e+07	4.27687e+07	4.76677e+07	5.73293e+07	6.34543e+07	5.38067e+07	8.38027e+07	7.74772e+07	86868438	6.31856e+07	1.02756e+08	6.42835e+07	9.62655e+07	2.07918e+08	5.74717e+07	3.36678e+07	1.27359e+08	1.24335e+08	278706356
comp.263	Methyl 4-hydroxycinnamate	8.84568e+06	6.11596e+06	1.63303e+07	2.66591e+07	5.3635e+06	1.15204e+07	6.84098e+06	1.79946e+06	3.11679e+06	2.07584e+06	979796	788211	1.13064e+06	742157	919054	949030	3.75781e+06	3.02983e+06	2.66892e+06	2.20354e+06	2.8756e+06
comp.264	Methyl ferulate	2.61084e+07	1.48598e+07	4.33338e+07	4.97883e+07	1.97202e+07	3.51599e+07	8.94426e+06	3.07466e+07	2.14494e+07	1.8495e+07	1.17906e+07	1.27495e+07	1.03884e+07	1.78783e+07	7.25365e+06	2.927e+07	2.6155e+07	3.34967e+07	1.23156e+07	2.40006e+07	961392
comp.265	Methyldienolone	3.84569e+06	1.17904e+06	2.46183e+06	3.72875e+06	4.41739e+06	3.00989e+06	9.30465e+06	2.09203e+06	1.27126e+07	1.291e+07	1.85835e+07	1.35294e+07	2.78872e+07	1.70099e+07	1.0426e+07	1.56282e+07	1.15063e+07	2.85092e+06	7.13842e+06	3.55736e+06	3.68585e+07
comp.266	MFCD03094040	2.83731e+07	2.45885e+07	5.28812e+07	7.02e+07	1.97629e+07	3.80528e+07	1.608e+07	3.83108e+07	3.04403e+07	1.08204e+07	2.94241e+07	8.30979e+07	5.05623e+07	5.0751e+07	2.79018e+07	3.32772e+07	5.22202e+07	5.9228e+07	3.98066e+07	6.56448e+07	7.35545e+06
comp.267	MFCD11045309	1.12643e+07	2.88584e+06	1.16931e+07	1.68721e+07	2.58493e+07	1.59829e+07	1.15804e+07	1.92918e+07	1.5272e+07	1.9027e+07	1.47297e+07	1.17053e+07	2.27037e+07	1.91704e+07	2.28784e+07	2.86825e+07	9.66333e+06	6.48513e+06	2.22134e+07	1.89111e+07	3.63354e+07
comp.268	N,N-Dibenzylacetamide	5.0209e+07	1.30325e+07	5.93411e+07	5.8902e+07	1.02183e+08	5.93176e+07	6.43739e+07	8.66927e+07	6.86102e+07	9.25323e+07	9.12063e+07	7.2262e+07	1.46485e+08	8.62649e+07	8.80446e+07	1.50861e+08	7.6784e+07	4.84687e+07	1.03619e+08	9.14912e+07	1.96279e+08
comp.269	N,N-Dimethylvaline	128579130	9.57772e+07	1.78887e+08	1.70012e+08	1.4573e+08	1.87871e+08	5.88407e+07	1.83982e+08	2.67202e+08	2.12674e+08	7.16461e+07	2.96125e+08	3.87829e+08	2.30182e+08	1.37666e+08	1.37235e+08	6.84432e+07	2.11701e+06	3.53746e+08	1.88908e+06	4.17529e+07
comp.270	N-{[(2R,4S,5R)-5-(3-Cyclopentyl-1-methyl-1H-pyrazol-5-yl)-1-azabicyclo[2.2.2]oct-2-yl]methyl}-4-methoxybenzamide	4.58593e+06	4.68213e+06	3.47412e+06	6.30801e+06	1.12603e+07	4.73623e+06	2.22344e+07	7.61227e+06	1.49443e+07	18212966	2.59956e+07	1.9935e+07	3.69908e+07	7.87716e+06	1.26921e+07	2.15606e+07	1.79461e+07	4.97042e+06	1.12592e+07	6.2474e+06	9.01979e+07
comp.271	N-benzyl-4-ethyl-N-isopropylbenzamide	3.27347e+06	545956	4.09465e+06	2.37217e+06	6.11442e+06	3.78403e+06	3.98339e+06	5.22393e+06	4.31755e+06	6.41406e+06	3.31238e+06	2.83237e+06	8.75976e+06	6.13418e+06	6.07773e+06	8.19533e+06	2.46576e+06	3.42637e+06	4.91667e+06	3.86043e+06	9.70066e+06
comp.272	N-Methylcaprolactam	1.33129e+07	3.09359e+06	1.49438e+07	1.99366e+07	3.30145e+07	1.47773e+07	1.71133e+07	2.43235e+07	2.31495e+07	3.17974e+07	2.7512e+07	2.42961e+07	4.5203e+07	2.61089e+07	2.58899e+07	4.82427e+07	3.26995e+07	2.06188e+07	4.39875e+07	2.8003e+07	6.80926e+07
comp.273	Norgestrel	4.70085e+06	1.58902e+06	1.25195e+07	3.46779e+07	1.85004e+07	2.00586e+07	5.71151e+07	1.33102e+07	2.24911e+07	2.61373e+07	2.79831e+07	1.09632e+07	1.67664e+07	6.06668e+06	1.21047e+07	2.57587e+07	1.96963e+07	1.38825e+06	7.47134e+06	1.3399e+06	3.66561e+07
comp.274	Oleic acid alkyne	1.4113e+08	2.29339e+08	2.82439e+08	3.07131e+08	160293456	2.46809e+08	1.25794e+08	1.77234e+08	1.75313e+08	1.55317e+08	1.31393e+08	3.13265e+08	2.72093e+08	2.30115e+08	2.72424e+08	2.43341e+08	1.92255e+08	1.43448e+08	3.18542e+08	1.95332e+08	8.26747e+07
comp.275	Oleoyl Ethyl Amide	1010178638	2.20375e+08	1254170620	1520816048	2267579526	1338624897	963552920	1321462208	1342593011	2251553127	1781274177	1460276455	2513089765	2250268025	2409100944	3384261782	1320141001	9.65733e+08	2176593678	2285047959	3913752288
comp.276	Palmitoyl sphingomyelin	6.00291e+08	5.58176e+08	3.1804e+08	4.35752e+08	824653026	6.88299e+08	7.66613e+08	6.49059e+08	5.83634e+08	1135120150	1297625349	2788070497	1264098407	8.27012e+08	8.12539e+08	1786410715	2659094492	1294615622	261913744	1042548416	1024232885
comp.277	Phenacetin	3.28605e+07	3.00745e+07	2.18541e+07	2.95107e+07	6.45897e+07	3.61225e+07	5.31779e+07	1.00089e+07	1.22487e+08	194910339	316141634	4.34654e+07	1.07906e+08	5.99454e+07	1.26114e+08	2.51458e+08	8.87387e+07	2.23406e+06	1.15322e+08	1.82105e+06	2.11736e+08
comp.278	Phenolphthalein	2.58582e+07	3.60098e+07	9.81509e+06	1.42224e+07	1.48863e+07	1.67883e+07	4.42946e+07	1.97817e+07	1.63441e+07	2.08684e+07	1.46752e+07	1.53014e+07	1.5978e+07	1.42784e+07	1.86598e+07	1.30428e+07	2.22358e+07	2.44365e+07	1.42545e+07	1.94025e+07	1.84923e+07
comp.279	Phthaldialdehyde	6.22553e+07	3.92465e+07	4.19299e+07	3.83858e+07	7.11009e+07	3.31007e+07	3.7554e+07	4.90978e+07	4.2226e+07	6.61387e+07	5.3417e+07	4.28152e+07	8.85749e+07	5.59627e+07	5.13532e+07	9.17275e+07	6.53278e+07	3.44159e+07	6.10096e+07	5.59152e+07	1.34263e+08
comp.280	Prostaglandin A1 ethyl ester	9.44859e+06	6.44957e+06	8.09177e+06	7.14391e+06	1.78284e+07	8.61726e+06	6.14796e+06	2.75283e+07	1.36936e+07	1.82409e+07	3.29877e+07	2.0831e+07	3.78864e+07	1.88702e+07	4.28732e+07	3.00701e+07	5.33937e+06	6.67078e+06	2.72431e+07	5.87312e+06	1.94556e+06
comp.281	Psicose	1.94436e+08	124333127	1.68636e+08	106532519	1.19533e+08	1.52289e+08	1.92879e+08	2.73363e+08	2.01204e+08	222979552	2.33498e+08	1.62836e+08	1.54572e+08	2.17941e+08	2.16103e+08	5.46738e+08	3.63647e+08	5.24456e+08	1.96502e+08	3.61786e+08	130802473
comp.282	Schaftoside	408753	1.64377e+06	371525	923695	143897	180864	112327	111185	157924	138723	151835	207976	355788	154156	571374	164153	2.27723e+07	3.99715e+07	4.93061e+06	3.71413e+07	2.19758e+06
comp.283	Trolox	155336	71544.1	64608.3	63705.5	132079	57846	98574	54190.5	137503	72258.9	113107	66518.6	155316	171430	57544.1	167243	81661.8	90527.7	87326.6	90961.8	104793
comp.284	Valpromide	6.16725e+06	1.69862e+06	7.04438e+06	7.8309e+06	1.22572e+07	6.76561e+06	6.66881e+06	7.53851e+06	1.01117e+07	1.21215e+07	1.20127e+07	9.34253e+06	1.96588e+07	1.23906e+07	1.27172e+07	1.95759e+07	1.17542e+07	6.10961e+06	1.19212e+07	1.07284e+07	3.09392e+07
comp.285	α-Cyano-3-hydroxycinnamic acid	9.71847e+07	1.54328e+08	1.77379e+08	1.72278e+08	1.50827e+08	1.70984e+08	1.36654e+08	2.11816e+08	2.67386e+08	3.12227e+08	1.27964e+08	2.53982e+08	2.7822e+08	1.93715e+08	1.25039e+08	1.58706e+08	7.3984e+07	1.44468e+06	3.02297e+08	4.43275e+06	2.76292e+07
comp.286	Δ17-6-keto prostaglandin F1α	332319	1.27149e+06	495361	233681	1.26323e+06	1.5851e+06	1.52885e+06	1.41611e+06	1.04755e+06	2.89226e+06	1.04292e+07	2.4829e+06	1.54467e+06	1.23888e+06	1.25285e+06	2.04467e+06	1.52259e+06	608942	3.33702e+06	281865	633326

## Sheet: Table S3
Table S3 Differential metabolites with a VIP value >1 in Control and MSP groups as compared with the Model group.
Control vs Model				MSP vs Model
No.	Metabolites	VIP value		No.	Metabolites	VIP value
1	Esculentic acid	1.90608		1	Corymboside	1.87229
2	9,10-Epoxystearic acid	1.8955		2	Schaftoside	1.84394
3	7-Sulfocholic acid	1.88469		3	6''-Malonylgenistin	1.83755
4	N,N-Dimethylsphingosine	1.8237		4	Genistein	1.83544
5	Ethyl palmitoleate	1.81801		5	LysoPC(O-18:0)	1.82571
6	(2S)-4-(Methylsulfanyl)-2-{[(2S)-2-pyrrolidiniumylcarbonyl]amino}butanoate	1.8029		6	Glycitein	1.82567
7	N-Acetylmuramic acid	1.76191		7	6''-O-Malonyldaidzin	1.81142
8	Thiamine	1.75311		8	Pipecolic acid	1.805
9	Indole-3-lactic acid	1.72318		9	L-Lysine	1.79448
10	2,4-di(4-hydroxyphenyl)cyclobutane-1,3-dicarboxylic acid	1.70401		10	Vicenin 2	1.7727
11	2,4-Dimethylnicotinic acid	1.69395		11	Uracil	1.75978
12	(3-Oxo-2,3-dihydro-4H-1,4-benzoxazin-4-yl)acetic acid	1.68335		12	5-Oxoprolylproline	1.75743
13	4,8-Dihydroxy-7-(hydroxymethyl)-6-methoxy-3,4-dihydro-1(2H)-naphthalenone	1.68284		13	Abietic acid	1.72406
14	5-(2-Hydroxyethyl)-4-methylthiazole	1.68173		14	PC(18:0/18:1(9Z))	1.72076
15	α-Amino-2-Indanacetic Acid	1.66446		15	12-OPDA	1.70144
16	Palmitoleic acid	1.65874		16	GU5140000	1.68674
17	LysoPE(18:1(11Z)/0:0)	1.62381		17	Sodium Tetradecyl Sulfate	1.65583
18	(2R)-3-{[(2-Aminoethoxy)(hydroxy)phosphoryl]oxy}-2-hydroxypropyl myristate	1.61102		18	7-Sulfocholic acid	1.65021
19	3-amino-2-phenyl-2H-pyrazolo[4,3-c]pyridine-4,6-diol	1.60216		19	5a-Pregnane-3,20-dione	1.64343
20	N-Acetyltryptophan	1.59832		20	Linoleoyl ethanolamide	1.63598
21	(2E)-3-(4-Hydroxy-3-methoxyphenyl)-N-[2-(1H-indol-3-yl)ethyl]acrylamide	1.59662		21	LPE 19:1; [M-H]	1.63569
22	Vicenin 2	1.57957		22	Indole-3-lactic acid	1.62627
23	Ile-Leu	1.57378		23	Ethyldiethanolamine	1.61506
24	Hexadecanedioic acid	1.57179		24	Corchorifatty acid F	1.6086
25	4-[2-(2,3-Dihydroxy-5,6,8a-trimethyloctahydro-2H-spiro[naphthalene-1,2'-oxiran]-5-yl)ethyl]-5-hydroxy-2(5H)-furanone	1.56552		25	Genistein 4'-O-glucuronide	1.60758
26	LysoPE(0:0/15:0)	1.56029		26	His-Pro	1.59851
27	(4Z,7Z,10Z,13Z,16Z)-18-[(2S,3R)-3-Ethyl-2-oxiranyl]-4,7,10,13,16-octadecapentaenoic acid	1.53777		27	N-Acetyltryptophan	1.58547
28	N-{[(2R,4S,5R)-5-(3-Cyclopentyl-1-methyl-1H-pyrazol-5-yl)-1-azabicyclo[2.2.2]oct-2-yl]methyl}-4-methoxybenzamide	1.53306		28	Moupinamide	1.57963
29	4-Methylumbelliferyl-α-D-glucopyranoside	1.5326		29	9-HODE	1.56936
30	Psicose	1.5285		30	PC(18:2(9Z,12Z)/18:2(9Z,12Z))	1.56934
31	Genistein	1.52782		31	4-(7-Hydroxy-4-oxo-4H-chromen-3-yl)phenyl hydrogen sulfate	1.55942
32	Friedelin	1.52694		32	5,7-Dihydroxy-2-(4-hydroxyphenyl)-4-oxo-4H-chromen-3-yl 2-O-hexopyranosylhexopyranoside	1.55664
33	Apigenin	1.51816		33	Arginyl-Phenylalanine	1.54519
34	Methyl 4-hydroxycinnamate	1.51518		34	Nervonic acid	1.53455
35	2-Hydroxymyristic acid	1.51398		35	4-(5,7-Dihydroxy-4-oxo-4H-chromen-3-yl)phenyl beta-D-glucopyranosiduronic acid	1.53313
36	4a-Carbinolamine tetrahydrobiopterin	1.51047		36	Diosmetin	1.51901
37	Ursolic acid	1.50588		37	2-(Butyryloxy)-3-(hexadecyloxy)propyl 2-(trimethylammonio)ethyl phosphate	1.50023
38	5,7-Dihydroxy-2-(4-hydroxyphenyl)-4-oxo-4H-chromen-3-yl 2-O-hexopyranosylhexopyranoside	1.47445		38	Ile-Leu	1.49267
39	Pentadecanoic acid	1.46761		39	LysoPE(0:0/18:0)	1.48716
40	Gly-Phe	1.44917		40	12-hydroxyjasmonic acid	1.48258
41	L-Urobilin	1.43829		41	Cortisol	1.47974
42	(3β,5ξ,9ξ,18ξ)-22-Hydroxyolean-12-en-3-yl 6-deoxy-α-L-mannopyranosyl-(1->2)hexopyranosyl-(1->2)-β-D-glucopyranosiduronic acid	1.43477		42	(3beta,5xi,9xi)-28-Hydroxy-28-oxoolean-12-en-3-yl beta-D-galactopyranosyl-(1-3)-[beta-D-glucopyranosyl-(1-2)]-beta-D-glucopyranosiduronic acid	1.47275
43	4-(3,4-dimethoxyphenyl)-3-methyl-1H-pyrazol-5-amine	1.43308		43	Apigenin	1.46705
44	Dehydroandrosterone	1.42918		44	L-Palmitoylcarnitine	1.46358
45	Leu-Gly	1.42609		45	3-Oxocholic acid	1.44808
46	Sphingosine	1.4182		46	(2E)-3-(4-Hydroxy-3-methoxyphenyl)-N-[2-(1H-indol-3-yl)ethyl]acrylamide	1.44521
47	LPE 12:0; [M-H]	1.40431		47	(3β,5ξ,9ξ,18ξ)-22-Hydroxyolean-12-en-3-yl 6-deoxy-α-L-mannopyranosyl-(1->2)hexopyranosyl-(1->2)-β-D-glucopyranosiduronic acid	1.44092
48	Docosatrienoic acid	1.40349		48	DL-2-Aminooctanoic acid	1.43046
49	MG(0:0/18:3(9Z,12Z,15Z)/0:0)	1.39362		49	L-Arginine	1.42705
50	Gly-Gly-Leu	1.37696		50	Tetradecanedioic acid	1.42218
51	Gly-Leu	1.37651		51	7-Methyl-2-phenylquinoline-4-carboxylic acid	1.41149
52	13-HOTE	1.366		52	4-Methylumbelliferyl-α-D-glucopyranoside	1.40483
53	(3beta,5xi,9xi)-28-Hydroxy-28-oxoolean-12-en-3-yl beta-D-galactopyranosyl-(1-3)-[beta-D-glucopyranosyl-(1-2)]-beta-D-glucopyranosiduronic acid	1.36452		53	γGlu-Leu	1.40388
54	Docosapentaenoic acid	1.36225		54	Taurocholic acid	1.40255
55	Sodium Tetradecyl Sulfate	1.3602		55	Traumatic acid	1.39682
56	8-Iso-15-keto-prostaglandin-F2	1.35812		56	Glycerophospho-N-palmitoyl ethanolamine	1.3876
57	3,3-Dimethylcyclohexanone	1.35414		57	(3-Oxo-2,3-dihydro-4H-1,4-benzoxazin-4-yl)acetic acid	1.385
58	Schaftoside	1.35392		58	4-(3,4-dimethoxyphenyl)-3-methyl-1H-pyrazol-5-amine	1.38226
59	3-Hydroxypicolinic acid	1.34715		59	Enterolactone	1.37749
60	Progesterone	1.34206		60	Erucic acid	1.36576
61	Diosmetin	1.34038		61	Gibberellin A14	1.35883
62	MG(18:2(9Z,12Z)/0:0/0:0)	1.33853		62	6''-O-Acetylgenistin	1.35181
63	Methyl hexadecanoic acid	1.33764		63	(1R,2R,5S,8R,10R,14R)-20-hydroxy-1,2,14,18,18-pentamethyl-17-oxo-8-(prop-1-en-2-yl)pentacyclo[11.8.0.0Â?,Âaâ°.0âµ,âa.0Âaâ´,Âaâa]henicosane-5-carboxylic acid	1.34698
64	(2S)-2-Hydroxy-3-[(hydroxy{[(1S,2R,3R,4S,5S,6R)-2,3,4,5,6-pentahydroxycyclohexyl]oxy}phosphoryl)oxy]propyl (9Z,12Z)-9,12-octadecadienoate	1.32489		64	α-Cyano-3-hydroxycinnamic acid	1.32797
65	L-Lysine	1.32182		65	Aspartame	1.32656
66	16-Hydroxy hexadecanoic acid	1.30345		66	LysoPE(18:1(11Z)/0:0)	1.32525
67	Ile-Trp	1.30079		67	Dihydrotestosterone	1.27927
68	Pipecolic acid	1.30042		68	1,2-Dilinoleoylglycerol	1.27603
69	Corymboside	1.29975		69	Ile-Trp	1.27505
70	Phe-Phe	1.29906		70	(3β,5α)-20-Oxopregnan-3-yl hydrogen sulfate	1.27194
71	4-Methoxybenzaldehyde	1.26499		71	α-Amino-2-Indanacetic Acid	1.25714
72	12-hydroxyjasmonic acid	1.25632		72	3-tert-Butyladipic acid	1.24686
73	Methyldienolone	1.25244		73	(2S)-2-Hydroxy-3-[(hydroxy{[(1S,2R,3R,4S,5S,6R)-2,3,4,5,6-pentahydroxycyclohexyl]oxy}phosphoryl)oxy]propyl (9Z,12Z)-9,12-octadecadienoate	1.24312
74	7α-Hydroxy-3-oxo-4-cholestenoate	1.25063		74	7-Methylguanine	1.23291
75	Glu-Leu	1.24632		75	Medicagenic acid	1.22015
76	3a,6b,7b-Trihydroxy-5b-cholanoic acid	1.24358		76	2-Hydroxyquinoline	1.21586
77	Deoxycholic acid	1.2357		77	2,4-di(4-hydroxyphenyl)cyclobutane-1,3-dicarboxylic acid	1.20996
78	Gly-Met	1.23331		78	13-HOTE	1.20797
79	LPE 13:0; [M-H]	1.21871		79	(5E)-7-methylidene-10-oxo-4-(propan-2-yl)undec-5-enoic acid	1.19179
80	Δ17-6-keto prostaglandin F1α	1.21802		80	9-OxoODE	1.18483
81	Riboflavin	1.21416		81	Cholesta-4,6-dien-3-one	1.18365
82	Docosahexaenoic acid ethyl ester	1.21319		82	Ile-Met	1.17064
83	Diloxanide	1.19589		83	N,N-Dimethylvaline	1.16943
84	Acetophenone	1.19274		84	5-Hydroxyindoleacetic acid	1.16921
85	α-Cyano-3-hydroxycinnamic acid	1.18799		85	Gly-Leu	1.16091
86	γ-CEHC	1.18517		86	3-Hydroxypicolinic acid	1.15837
87	Equol	1.18481		87	Prostaglandin A1 ethyl ester	1.13888
88	5a-Pregnane-3,20-dione	1.17675		88	Curvularin	1.13764
89	4-Hydroxybenzaldehyde	1.17434		89	1,5-Isoquinolinediol	1.12726
90	Adrenic acid	1.15171		90	4-Hydroxyindole	1.11842
91	Gln-Leu	1.14374		91	N-Methylcaprolactam	1.11627
92	4-Methyl-1-piperazine acetic acid	1.14193		92	Dihydrojasmonic acid	1.10883
93	Oleic acid alkyne	1.13962		93	Isoeugenyl acetate	1.10432
94	3,5,5-Trimethyl-2-cyclohexen-1-one	1.12601		94	PE(15:0/15:0)	1.10013
95	α-Tocopherol acetate	1.12595		95	Xanthurenic acid	1.09946
96	Isoeugenyl acetate	1.12331		96	α-Tocopherol acetate	1.09426
97	4-Guanidinobutanoic acid	1.11225		97	14,16-dihydroxy-3-methyl-3,4,5,6,7,8,9,10-octahydro-1H-2-benzoxacyclotetradecine-1,7-dione	1.09109
98	Gibberellin A14	1.1122		98	Norgestrel	1.07212
99	Eicosapentaenoic acid methyl ester	1.10659		99	Acetophenone	1.06779
100	Glu-Phe	1.0975		100	3-Methylcyclopentadecanone	1.06708
101	trans-Ferulic acid	1.09729		101	Kynurenic acid	1.04596
102	Avocadene 1-acetate	1.09246		102	Δ17-6-keto prostaglandin F1α	1.04401
103	PC(18:0/18:1(9Z))	1.09062		103	6β-Naltrexol-d3	1.04113
104	Dihydrojasmonic acid	1.09053		104	Cholecalciferol	1.034
105	6-Phenoxynicotinic acid	1.07676		105	3-(3-pyridinyl)propanoic acid	1.02923
106	Val-Trp	1.07353		106	epsilon-Caprolactam	1.02793
107	Abietic acid	1.0551		107	Leu-Pro	1.02686
108	Trp-Thr	1.04126		108	LysoPE(0:0/15:0)	1.00037
109	Palmitoyl sphingomyelin	1.02056
110	Cer-BDS d34:0; Cer-BDS d17:0/17:0; [M+FA-H]	1.01981
111	Prostaglandin F1a	1.01085
112	L,L-Cyclo(leucylprolyl)	1.00984
113	Eicosadienoic acid	1.0014
